# Supplementary material for: Strong metal–metal coupling in mixed-valent intermediates [Cl(L)Ru(μ-tppz)Ru(L)Cl]+, L = β-diketonato ligands, tppz = 2,3,5,6-tetrakis(2-pyridyl)pyrazine
Source: Royal Society of Chemistry journal article supplement (doi:10.1039/c2dt31763j), 2012-01-01
Supplement: c2dt31763j.pdf [file c2dt31763j.pdf]

## **Supplementary Information**

### **Strong metal-metal coupling in mixed-valent intermediates [Cl(L)Ru( $\mu$ -tppz)Ru(L)Cl]<sup>+</sup>, L = $\beta$ -diketonato ligands, tppz = 2,3,5,6-tetrakis(2-pyridyl)pyrazine**

Tanaya Kundu,<sup>a</sup> David Schweinfurth,<sup>b</sup> Biprajit Sarkar,<sup>b</sup> Tapan Kumar Mondal,<sup>c</sup> Jan Fiedler,<sup>d</sup> Shaikh M. Mobin,<sup>a</sup> Vedavati G. Puranik,<sup>e</sup> Wolfgang Kaim,<sup>\*b</sup> and Goutam Kumar Lahiri<sup>\*a</sup>

<sup>a</sup>*Department of Chemistry, Indian Institute of Technology Bombay, Powai, Mumbai-400076, India. E-mail: [lahiri@chem.iitb.ac.in](mailto:lahiri@chem.iitb.ac.in)*

<sup>b</sup>*Institut für Anorganische Chemie, Universität Stuttgart, Pfaffenwaldring 55, D-70550 Stuttgart, Germany. E-mail: [kaim@iac.uni-stuttgart.de](mailto:kaim@iac.uni-stuttgart.de)*

<sup>c</sup>*Department of Chemistry, Jadavpur University, Jadavpur, Kolkata-700032, India*

<sup>d</sup>*J. Heyrovský Institute of Physical Chemistry, v.v.i., Academy of Sciences of the Czech Republic, Dolejškova 3, CZ-18223 Prague, Czech Republic*

<sup>e</sup>*Center for Materials Characterization, National Chemical Laboratory, Dr. Homi Bhabha Road, Pune – 411008, India*

**Table S1** Selected parameters of symmetric tppz-bridged diruthenium complexes

| Complexes                                                                                                                                        | $K_c$             | $\nu_{\text{VCT}}/\text{nm}(\epsilon / \text{M}^{-1}\text{cm}^{-1})$ | $\Delta \nu_{1/2}/\text{cm}^{-1}$<br>(expt) | class              | $V_{ab}/\text{cm}^{-1}$  | Ref..  |
|--------------------------------------------------------------------------------------------------------------------------------------------------|-------------------|----------------------------------------------------------------------|---------------------------------------------|--------------------|--------------------------|--------|
| $[(\text{NH}_3)_3\text{Ru}^{\text{II}}(\text{tppz})\text{Ru}^{\text{II}}(\text{NH}_3)_3]^{4+}$<br><br>tppz = 2,3,5,6-tetrakis(2-pyridyl)pyrazine | $3.0 \times 10^8$ | NA (Not available)                                                   | NA                                          | -                  | -                        | 7a     |
| $[(\text{L})\text{Ru}^{\text{II}}(\text{tppz})\text{Ru}^{\text{II}}(\text{L})]^{4+}$<br><br>L = 2,2':6',2''-terpyridine                          | $1.8 \times 10^5$ | 1527(7560)<br>( $\text{CD}_3\text{CN}$ )                             | 970                                         | II-III<br><br>/III | 3274(based on class III) | 7b/ 7c |
| L = 4'-vinyl-2,2':6',2''-terpyridine                                                                                                             | $1.3 \times 10^6$ | -                                                                    | -                                           | -                  |                          |        |
| L = tppz                                                                                                                                         | $1.4 \times 10^9$ | -                                                                    | -                                           | -                  |                          |        |
| $[\text{Cl}(\text{L})\text{Ru}^{\text{II}}(\text{tppz})\text{Ru}^{\text{II}}(\text{L})\text{Cl}]^{2+}$<br><br>L = 2,2'-bipyridine                | $8.2 \times 10^4$ | 1647(-)<br>( $\text{CD}_3\text{CN}$ )                                | -                                           | -                  | -                        | 7d/ 7e |
| L = 4,4'-dimethy-2,2'-bipyridine                                                                                                                 | $8.2 \times 10^4$ | NA                                                                   | NA                                          | -                  | -                        |        |
| $[\text{Cl}(\text{L})\text{Ru}^{\text{II}}(\text{tppz})\text{Ru}^{\text{II}}(\text{L})\text{Cl}]^{2+}$<br><br>L = 2-phenylazopyridine            | $4.0 \times 10^3$ | 1890 (3800)                                                          | 1650                                        | II-III             | -                        | 7f     |

|                                                                                                        |                   |             |      |        |      |    |
|--------------------------------------------------------------------------------------------------------|-------------------|-------------|------|--------|------|----|
| L = 2-[(4-methylphenyl)azo]-pyridine                                                                   | $2.1 \times 10^4$ | 1890 (4600) | 1650 | II-III | -    |    |
| L = 2-[(4-chlorophenyl)azo]-pyridine                                                                   | $2.2 \times 10^3$ | 1890 (3000) | 1650 | II-III | -    |    |
| L = 2-[(3-methylphenyl)azo]-pyridine                                                                   | $6.4 \times 10^3$ | NA          | -    | -      | -    |    |
| $[\text{Cl}(\text{L})\text{Ru}^{\text{II}}(\text{tppz})\text{Ru}^{\text{II}}(\text{L})\text{Cl}]^{2+}$ |                   |             |      |        |      | 7g |
| L = 2,2'-dipyridylamine                                                                                | $2.7 \times 10^6$ | 1700 (2250) | 1390 | III    | 2941 |    |
| $[\text{Cl}(\text{L})\text{Ru}^{\text{II}}(\text{tppz})\text{Ru}^{\text{II}}(\text{L})\text{Cl}]^{2+}$ |                   |             |      |        |      | 7h |
| L = 2-(2-pyridyl)benzoxazole                                                                           | $3.8 \times 10^4$ | 1635 (1400) | 1790 | II-III | -    |    |
| L = 2-(2-pyridyl)benzthiazole                                                                          | $5.6 \times 10^4$ | 1465 (440)  | 2030 | II-III | -    |    |
| L = 1-methyl-2-(2-pyridyl)-<br>1 <i>H</i> -benzimidazole                                               | $2.6 \times 10^4$ | 1555 (423)  | 1530 | II-III | -    |    |
| L = 2-(2-pyridyl)benzimidazolate                                                                       | $2.6 \times 10^4$ | -           | -    | -      | -    |    |
| $[\text{Cl}(\text{L})\text{Ru}^{\text{II}}(\text{tppz})\text{Ru}^{\text{II}}(\text{L})\text{Cl}]^{2+}$ |                   |             |      |        |      | 7i |
| L = 2,2'-dipyridylketone                                                                               | $2.5 \times 10^4$ | 1800 (1500) | 700  | II-III | -    |    |
| $[\text{Cl}(\text{L})\text{Ru}^{\text{II}}(\text{tppz})\text{Ru}^{\text{II}}(\text{L})\text{Cl}]^{2+}$ |                   |             |      |        |      | 7j |
| L = 2,2'-bis(1-methylimidazolyl)<br>ketone                                                             | $1.2 \times 10^5$ | 1637 (1200) | 1560 | II-III | -    |    |

|                                                                   |                      |                      |      |     |      |    |
|-------------------------------------------------------------------|----------------------|----------------------|------|-----|------|----|
| $[(L^-)Ru^{II}(tppz)Ru^{II}(L^-)]^{2+}$                           |                      |                      |      |     |      | 7k |
| L = 1,3-di(2-pyridyl)benzene                                      | $5.4 \times 10^4$    | 1661(5500)           | 1033 | -   | -    |    |
| L = methyl 3,5-di(2-pyridyl)benzoate                              | $3.8 \times 10^5$    | 1686(7500)           | 1062 | -   | -    |    |
|                                                                   |                      | (CD <sub>3</sub> CN) |      |     |      |    |
| $[(L)ClRu^{II}(tppz)Ru^{II}(L)Cl]$                                |                      |                      |      |     |      | 7l |
| L = 2-picolinate                                                  | $4.0 \times 10^6$    | 1670 (2600)          | 1620 | III | 2994 |    |
| L = 2-quinolinecarboxylate                                        | $8.9 \times 10^6$    | 1575 (1200)          | 1115 | III | 3174 |    |
| L = 8-quinolinecarboxylate                                        | $1.9 \times 10^7$    | 1875 (2600)          | 1370 | III | 2666 |    |
| $[Cl(Q^{\bullet-})Ru^{II}(tppz)Ru^{II}(Q^{\bullet-})Cl]$          |                      |                      |      |     |      | 7m |
| Q <sup>•-</sup> = o-benzosemiquinone                              | $7.6 \times 10^2$    | NA                   | NA   | -   | -    |    |
| Q <sup>•-</sup> = 3,5- ditert-butyl-o-benzosemiquinone            | $3.6 \times 10^3$    | NA                   | NA   | -   | -    |    |
| $[Cl_3Ru^{II}(tppz)Ru^{III}Cl_3]^-$                               | $1.0 \times 10^{12}$ | 1798 (3500)          | 1150 | III | 2780 | 7n |
|                                                                   |                      | (CD <sub>3</sub> CN) |      |     |      |    |
| $[Cl(Q^{\bullet-})Ru^{III}(tppz)Ru^{III}(Q^{\bullet-})Cl]^{2+}$   |                      |                      |      |     |      | 7o |
| Q <sup>•-</sup> = 4,6-di-tert-butyl-N-phenyl-o-benzosemiquinonato | $1.3 \times 10^6$    | 1853 (4150)          | 1350 | III | 2698 |    |

|                                                                                                                                                                                                                                                                                        |                                                                                                                |                                                                                     |                                                      |                                                 |                                                      |                     |
|----------------------------------------------------------------------------------------------------------------------------------------------------------------------------------------------------------------------------------------------------------------------------------------|----------------------------------------------------------------------------------------------------------------|-------------------------------------------------------------------------------------|------------------------------------------------------|-------------------------------------------------|------------------------------------------------------|---------------------|
| $[(\text{NH}_3)_5\text{Ru}(\text{pyrazine})\text{Ru}(\text{NH}_3)_5]^{5+}$<br><br><b>(Creutz-Taube ion)</b>                                                                                                                                                                            | $4.1 \times 10^6$                                                                                              | 1570 (5000)<br><br>(D <sub>2</sub> O)                                               | 1480                                                 | II-III<br><br>/III                              | 3185<br><br>(based on<br>class III)                  | 1b/7e               |
| $[(\text{L})\text{ClRu}^{\text{II}}(\text{tppz})\text{Ru}^{\text{II}}(\text{L})\text{Cl}]$<br><br>L = acetylacetonate<br><br>L = 3,5-heptanedionate<br><br>L = 2,2,6,6-tetramethyl-3,5-<br>heptanedionate<br><br>L = 3-methyl-2,4-pentanedionate<br><br>L = 3-ethyl-2,4-pentanedionate | $10^{10}$<br><br>$1.5 \times 10^{10}$<br><br>$1.1 \times 10^{12}$<br><br>$10^{10}$<br><br>$1.5 \times 10^{10}$ | 1680(2900)<br><br>1688(3300)<br><br>1750(3000)<br><br>1660(2300)<br><br>1674 (2239) | 1588<br><br>1605<br><br>1994<br><br>2135<br><br>1843 | III<br><br>III<br><br>III<br><br>III<br><br>III | 2976<br><br>2962<br><br>2857<br><br>3012<br><br>2986 | Present<br><br>work |

**Table S2** Crystallographic data and refinement parameters for

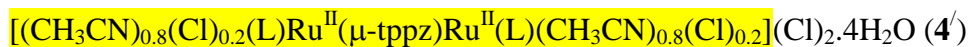

---

|                                            |                                                                                                    |
|--------------------------------------------|----------------------------------------------------------------------------------------------------|
|                                            | <b>4'</b>                                                                                          |
| Empirical formula                          | <b>C<sub>39.25</sub>H<sub>47</sub>Cl<sub>2.50</sub>N<sub>7.50</sub>O<sub>8</sub>Ru<sub>2</sub></b> |
| Formula weight                             | <b>1042.61</b>                                                                                     |
| Crystal size (mm)                          | 0.42 x 0.32 x 0.12                                                                                 |
| Crystal system                             | <b>Monoclinic</b>                                                                                  |
| Space group                                | <b>C 2/c</b>                                                                                       |
| <i>a</i> / Å                               | 11.781(5)                                                                                          |
| <i>b</i> / Å                               | 13.680(5)                                                                                          |
| <i>c</i> / Å                               | 27.374(11)                                                                                         |
| $\alpha$ (°)                               | 90                                                                                                 |
| $\beta$ (°)                                | 95.375(15)                                                                                         |
| $\gamma$ (°)                               | 90                                                                                                 |
| <i>V</i> / Å <sup>3</sup>                  | 4392(3)                                                                                            |
| <i>Z</i>                                   | 4                                                                                                  |
| $\rho_{\text{calcd}}$ / g cm <sup>-3</sup> | <b>1.577</b>                                                                                       |

---

---

|                                                |                                 |
|------------------------------------------------|---------------------------------|
| $\mu / \text{mm}^{-1}$                         | 0.898                           |
| $T / \text{K}$                                 | 170(2)                          |
| $hkl$ range                                    | -13 to 14, -16 to 16, -32 to 29 |
| $F(000)$                                       | 2118                            |
| $\theta$ range ( $^{\circ}$ )                  | 1.49 to 25.00                   |
| Reflns collected                               | 17147                           |
| Unique reflns ( $R_{\text{int}}$ )             | 3875 [0.0893]                   |
| Data/restraints/parameters                     | 3875 / 25 / 298                 |
| $R1, wR2 (I > 2\sigma(I))$                     | 0.0618, 0.1597                  |
| $R1, wR2$ (all data)                           | 0.1107, 0.1874                  |
| GOF                                            | 1.029                           |
| Largest diff. peak/hole / $e \text{ \AA}^{-3}$ | 0.858 / -1.368                  |

---

**Table S3** Selected bond lengths (Å) and bond angles (°) for **4'**

| Bond distances |           | Bond angles |          |
|----------------|-----------|-------------|----------|
| Ru-N2          | 1.918(6)  | N2-Ru-O2    | 90.4(2)  |
| Ru-N1          | 2.067(6)  | N2-Ru-N1    | 80.0(2)  |
| Ru-N3          | 2.057(6)  | O2-Ru-N1    | 89.7(2)  |
| Ru-O2          | 2.029(6)  | N2-Ru-N3    | 81.0(2)  |
| Ru-O1          | 2.060(5)  | O2-Ru-N3    | 90.7(2)  |
| Ru-N4          | 1.952(14) | O2-Ru-O1    | 88.8(2)  |
| Ru-Cl3         | 2.45(2)   | N1-Ru-O1    | 101.2(2) |
|                |           | N3-Ru-O1    | 97.8(2)  |
|                |           | N2-Ru-N4    | 89.1(6)  |
|                |           | N1-Ru-N4    | 91.1(7)  |
|                |           | N3-Ru-N4    | 88.3(7)  |
|                |           | O1-Ru-N4    | 91.6(6)  |
|                |           | N1-Ru-N3    | 161.0(2) |
|                |           | N2-Ru-O1    | 178.6(2) |
|                |           | O2-Ru-N4    | 179.0(6) |



|           |          |
|-----------|----------|
| N2-Ru-Cl3 | 94.3(8)  |
| O2-Ru-Cl3 | 174.3(8) |
| N3-Ru-Cl3 | 93.2(8)  |
| O1-Ru-Cl3 | 86.5(8)  |
| N1-Ru-Cl3 | 87.9(9)  |

**Table S4** Selected bond angles (°) for **1-3** and **5**

| Bond angles | <b>1</b>   |       | <b>2</b>  |            | <b>3</b> |            | <b>5</b> |     |
|-------------|------------|-------|-----------|------------|----------|------------|----------|-----|
|             | X-ray      | DFT   | X-ray     | DFT        | X-ray    | DFT        | X-ray    | DFT |
| N2-Ru1-N1   | 80.44(11)  | 80.18 | 81.12(8)  | 80.75(15)  | 80.27    | 80.83(18)  |          |     |
| N2-Ru1-O1   | 86.47(10)  | 85.54 | 90.54(8)  | 86.83(15)  | 88.60    | 95.34(19)  |          |     |
| N1-Ru1-O1   | 91.30(10)  | 93.82 | 83.44(8)  | 84.94(14)  | 87.70    | 87.22(19)  |          |     |
| N2-Ru1-N3   | 80.39(11)  | 80.16 | 80.49(8)  | 80.11(16)  | 80.01    | 79.66(19)  |          |     |
| O1-Ru1-N3   | 96.03(10)  | 94.09 | 88.76(8)  | 95.51(14)  | 92.28    | 90.51(19)  |          |     |
| N1-Ru1-O2   | 101.07(10) | 100.3 | 97.83(8)  | 98.70(13)  | 100.5    | 98.76(18)  |          |     |
| O1-Ru1-O2   | 91.17(9)   | 88.68 | 89.96(7)  | 89.12(14)  | 88.11    | 88.93(17)  |          |     |
| N3-Ru1-O2   | 98.45(10)  | 100.1 | 100.64(8) | 100.51(14) | 96.32    | 101.00(18) |          |     |
| N2-Ru1-Cl1  | 96.81(8)   | 97.04 | 90.08(7)  | 96.67(13)  | 94.27    | 88.11(16)  |          |     |
| N1-Ru1-Cl1  | 85.20(8)   | 86.55 | 96.80(7)  | 93.83(11)  | 90.89    | 92.53(16)  |          |     |
| N3-Ru1-Cl1  | 88.60(8)   | 86.45 | 91.20(7)  | 86.89(12)  | 89.18    | 90.92(16)  |          |     |
| O2-Ru1-Cl1  | 85.65(7)   | 88.73 | 89.43(6)  | 87.38(11)  | 89.01    | 87.61(14)  |          |     |
| N1-Ru1-N3   | 158.99(11) | 158.1 | 159.93(8) | 160.79(14) | 160.1    | 160.06(19) |          |     |
| N2-Ru1-O2   | 177.23(10) | 174.2 | 178.78(8) | 175.94(17) | 176.6    | 175.7(2)   |          |     |

---

|            |           |       |           |            |       |            |
|------------|-----------|-------|-----------|------------|-------|------------|
| O1-Ru1-Cl1 | 174.73(7) | 177.4 | 179.37(5) | 176.07(10) | 177.1 | 176.45(11) |
| N5-Ru2-N6  |           |       |           | 80.59(15)  | 80.16 | 80.49(19)  |
| N5-Ru2-N4  |           |       |           | 79.57(15)  | 80.07 | 81.0(2)    |
| N5-Ru2-O4  |           |       |           | 177.76(16) | 177.1 | 91.33(19)  |
| N6-Ru2-O4  |           |       |           | 101.33(13) | 100.7 | 89.63(19)  |
| N4-Ru2-O4  |           |       |           | 98.43(13)  | 99.15 | 89.92(19)  |
| N6-Ru2-O3  |           |       |           | 87.13(15)  | 90.61 | 99.0(2)    |
| N4-Ru2-O3  |           |       |           | 89.00(16)  | 90.39 | 99.6(2)    |
| O4-Ru2-O3  |           |       |           | 90.87(14)  | 89.01 | 88.57(18)  |
| N5-Ru2-Cl2 |           |       |           | 94.39(13)  | 93.72 | 89.80(16)  |
| N6-Ru2-Cl2 |           |       |           | 92.64(12)  | 88.86 | 89.37(15)  |
| N4-Ru2-Cl2 |           |       |           | 92.07(13)  | 90.14 | 91.45(15)  |
| O3-Ru2-Cl2 |           |       |           | 177.46(10) | 177.1 | 90.28(15)  |
| N6-Ru2-N4  |           |       |           | 159.90(14) | 160.1 | 161.43(19) |
| N5-Ru2-O3  |           |       |           | 88.07(15)  | 89.19 | 179.5(2)   |
| O4-Ru2-Cl2 |           |       |           | 86.69(11)  | 89.07 | 178.34(12) |

---

**Table S5** Compositions and energies of some selected molecular orbitals of **1**

| MO      | Energy/ eV | Compositions (%) |    |      |    |
|---------|------------|------------------|----|------|----|
|         |            | Ru               | L  | tppz | Cl |
| LUMO+5  | -1.05      | 06               | 01 | 93   | 0  |
| LUMO+4  | -1.10      | 03               | 0  | 97   | 0  |
| LUMO+3  | -1.12      | 03               | 0  | 97   | 0  |
| LUMO+2  | -1.79      | 07               | 01 | 92   | 0  |
| LUMO+1  | -2.33      | 26               | 02 | 71   | 01 |
| LUMO    | -2.61      | 06               | 01 | 93   | 0  |
| HOMO    | -4.48      | 66               | 06 | 12   | 16 |
| HOMO-1  | -4.70      | 58               | 18 | 14   | 10 |
| HOMO-2  | -4.83      | 53               | 18 | 15   | 14 |
| HOMO-3  | -5.14      | 68               | 10 | 08   | 14 |
| HOMO-4  | -5.16      | 36               | 04 | 25   | 35 |
| HOMO-5  | -5.20      | 67               | 14 | 08   | 11 |
| HOMO-6  | -6.20      | 16               | 74 | 10   | 0  |
| HOMO-7  | -6.24      | 22               | 71 | 03   | 04 |
| HOMO-8  | -6.32      | 19               | 02 | 14   | 65 |
| HOMO-9  | -6.34      | 13               | 05 | 05   | 77 |
| HOMO-10 | -6.37      | 21               | 04 | 13   | 62 |

**Table S6** Selected molecular orbitals along with their energies and compositions of **3**

| MO      | Energy/ eV | Compositions (%) |    |      |    |
|---------|------------|------------------|----|------|----|
|         |            | Ru               | L  | tppz | Cl |
| LUMO+5  | -1.06      | 03               | 01 | 96   | 0  |
| LUMO+4  | -1.15      | 05               | 02 | 93   | 0  |
| LUMO+3  | -1.17      | 03               | 02 | 95   | 0  |
| LUMO+2  | -1.84      | 07               | 06 | 87   | 0  |
| LUMO+1  | -2.33      | 24               | 04 | 70   | 02 |
| LUMO    | -2.83      | 08               | 03 | 89   | 0  |
| HOMO    | -4.51      | 65               | 06 | 12   | 17 |
| HOMO-1  | -4.71      | 56               | 17 | 10   | 17 |
| HOMO-2  | -4.82      | 50               | 20 | 13   | 17 |
| HOMO-3  | -5.10      | 59               | 13 | 11   | 17 |
| HOMO-4  | -5.17      | 47               | 10 | 19   | 24 |
| HOMO-5  | -5.20      | 60               | 15 | 12   | 13 |
| HOMO-6  | -6.18      | 22               | 69 | 08   | 01 |
| HOMO-7  | -6.20      | 23               | 68 | 02   | 07 |
| HOMO-8  | -6.29      | 13               | 05 | 13   | 69 |
| HOMO-9  | -6.35      | 16               | 03 | 18   | 63 |
| HOMO-10 | -6.44      | 24               | 05 | 13   | 58 |

**Table S7** Selected molecular orbitals along with their energies and compositions of **1<sup>+</sup>**

(*S*=1/2)

| $\alpha$ -spin |            |                 |    |      |    |
|----------------|------------|-----------------|----|------|----|
| MO             | Energy/ eV | Composition (%) |    |      |    |
|                |            | Ru              | L  | tppz | Cl |
| LUMO+5         | -3.76      | 01              | 0  | 96   | 03 |
| LUMO+4         | -3.77      | 05              | 01 | 95   | 0  |
| LUMO+3         | -3.78      | 03              | 0  | 97   | 0  |
| LUMO+2         | -4.50      | 05              | 01 | 94   | 0  |
| LUMO+1         | -5.32      | 13              | 02 | 85   | 0  |
| LUMO           | -5.34      | 03              | 01 | 96   | 0  |
| SOMO           | -7.88      | 43              | 40 | 08   | 09 |
| HOMO-1         | -7.94      | 38              | 44 | 07   | 11 |
| HOMO-2         | -8.25      | 51              | 09 | 09   | 31 |
| HOMO-3         | -8.40      | 50              | 16 | 07   | 27 |
| HOMO-4         | -8.42      | 48              | 21 | 06   | 25 |
| HOMO-5         | -8.59      | 33              | 07 | 10   | 50 |
| HOMO-6         | -9.09      | 30              | 41 | 29   | 0  |
| HOMO-7         | -9.20      | 48              | 43 | 09   | 0  |
| HOMO-8         | -9.40      | 15              | 08 | 71   | 06 |
| HOMO-9         | -9.59      | 25              | 03 | 25   | 47 |
| HOMO-10        | -9.61      | 28              | 03 | 18   | 51 |

---

| $\beta$ -spin |       |    |    |    |    |  |
|---------------|-------|----|----|----|----|--|
| LUMO+5        | -3.81 | 03 | 0  | 97 | 0  |  |
| LUMO+4        | -3.83 | 04 | 0  | 96 | 0  |  |
| LUMO+3        | -4.47 | 11 | 01 | 87 | 01 |  |
| LUMO+2        | -4.93 | 45 | 04 | 47 | 04 |  |
| LUMO+1        | -5.35 | 04 | 01 | 95 | 0  |  |
| LUMO          | -5.96 | 67 | 06 | 16 | 11 |  |
| HOMO          | -7.70 | 27 | 07 | 47 | 19 |  |
| HOMO-1        | -7.71 | 46 | 32 | 12 | 10 |  |
| HOMO-2        | -7.79 | 44 | 31 | 12 | 13 |  |
| HOMO-3        | -8.22 | 58 | 16 | 07 | 19 |  |
| HOMO-4        | -8.25 | 55 | 21 | 07 | 17 |  |
| HOMO-5        | -9.00 | 30 | 56 | 14 | 0  |  |
| HOMO-6        | -9.06 | 39 | 54 | 06 | 01 |  |
| HOMO-7        | -9.32 | 09 | 10 | 03 | 78 |  |
| HOMO-8        | -9.42 | 10 | 03 | 69 | 18 |  |
| HOMO-9        | -9.46 | 10 | 33 | 04 | 53 |  |
| HOMO-10       | -9.52 | 21 | 02 | 25 | 52 |  |

---

**Table S8** Selected molecular orbitals along with their energies and compositions of **3<sup>+</sup>**

( $S=1/2$ )

| $\alpha$ -spin |            |                 |    |      |    |
|----------------|------------|-----------------|----|------|----|
| MO             | Energy/ eV | Composition (%) |    |      |    |
|                |            | Ru              | L  | tppz | Cl |
| LUMO+5         | -3.69      | 02              | 01 | 97   | 0  |
| LUMO+4         | -3.71      | 04              | 04 | 92   | 0  |
| LUMO+3         | -3.73      | 03              | 03 | 94   | 0  |
| LUMO+2         | -4.46      | 04              | 06 | 90   | 0  |
| LUMO+1         | -5.15      | 13              | 03 | 83   | 01 |
| LUMO           | -5.47      | 05              | 03 | 91   | 01 |
| SOMO           | -7.71      | 45              | 25 | 07   | 23 |
| HOMO-1         | -7.86      | 43              | 29 | 08   | 20 |
| HOMO-2         | -8.02      | 50              | 11 | 10   | 29 |
| HOMO-3         | -8.10      | 47              | 29 | 10   | 14 |
| HOMO-4         | -8.29      | 42              | 27 | 10   | 21 |
| HOMO-5         | -8.36      | 37              | 08 | 09   | 46 |
| HOMO-6         | -8.97      | 22              | 31 | 41   | 06 |
| HOMO-7         | -9.03      | 38              | 49 | 06   | 07 |
| HOMO-8         | -9.12      | 22              | 19 | 39   | 20 |
| HOMO-9         | -9.31      | 14              | 30 | 09   | 47 |
| HOMO-10        | -9.33      | 06              | 59 | 06   | 29 |



---

| $\beta$ -spin |       |    |    |    |    |
|---------------|-------|----|----|----|----|
| LUMO+5        | -3.73 | 02 | 02 | 96 | 0  |
| LUMO+4        | -3.74 | 03 | 03 | 94 | 0  |
| LUMO+3        | -4.41 | 14 | 06 | 78 | 02 |
| LUMO+2        | -4.75 | 42 | 06 | 49 | 03 |
| LUMO+1        | -5.47 | 07 | 03 | 90 | 0  |
| LUMO          | -5.87 | 62 | 07 | 21 | 10 |
| HOMO          | -7.41 | 32 | 08 | 41 | 19 |
| HOMO-1        | -7.53 | 51 | 20 | 08 | 21 |
| HOMO-2        | -7.74 | 48 | 17 | 14 | 21 |
| HOMO-3        | -7.96 | 50 | 25 | 15 | 10 |
| HOMO-4        | -8.12 | 53 | 24 | 09 | 14 |
| HOMO-5        | -8.85 | 29 | 55 | 10 | 06 |
| HOMO-6        | -8.92 | 31 | 59 | 07 | 03 |
| HOMO-7        | -8.97 | 12 | 07 | 10 | 71 |
| HOMO-8        | -9.13 | 10 | 04 | 48 | 38 |
| HOMO-9        | -9.23 | 12 | 27 | 06 | 55 |
| HOMO-10       | -9.30 | 06 | 63 | 05 | 26 |

---

**Table S9** Selected molecular orbitals along with their energies and compositions of  $\mathbf{1}^{2+}$

( $S=1$ )

| $\alpha$ -spin |            |                 |    |      |    |
|----------------|------------|-----------------|----|------|----|
| MO             | Energy/ eV | Composition (%) |    |      |    |
|                |            | Ru              | L  | tppz | Cl |
| LUMO+5         | -6.43      | 07              | 01 | 91   | 01 |
| LUMO+4         | -6.55      | 03              | 0  | 97   | 0  |
| LUMO+3         | -6.58      | 09              | 01 | 89   | 01 |
| LUMO+2         | -7.28      | 07              | 01 | 92   | 0  |
| LUMO+1         | -8.28      | 02              | 01 | 97   | 0  |
| LUMO           | -8.35      | 12              | 02 | 86   | 0  |
| SOMO1          | -10.56     | 34              | 54 | 06   | 06 |
| SOMO2          | -11.20     | 47              | 16 | 06   | 31 |
| HOMO-2         | -11.21     | 49              | 11 | 06   | 34 |
| HOMO-3         | -11.34     | 20              | 71 | 05   | 04 |
| HOMO-4         | -11.46     | 34              | 10 | 10   | 46 |
| HOMO-5         | -11.79     | 43              | 06 | 06   | 45 |
| HOMO-6         | -11.85     | 44              | 31 | 24   | 01 |
| HOMO-7         | -12.13     | 11              | 07 | 81   | 01 |
| HOMO-8         | -12.28     | 03              | 75 | 03   | 19 |
| HOMO-9         | -12.44     | 24              | 04 | 24   | 48 |
| HOMO-10        | -12.57     | 48              | 29 | 09   | 14 |

---

| $\beta$ -spin |        |    |    |    |    |
|---------------|--------|----|----|----|----|
| LUMO+5        | -6.56  | 04 | 0  | 96 | 0  |
| LUMO+4        | -7.21  | 11 | 01 | 87 | 01 |
| LUMO+3        | -7.90  | 41 | 04 | 50 | 05 |
| LUMO+2        | -8.22  | 08 | 02 | 90 | 0  |
| LUMO+1        | -8.94  | 45 | 05 | 38 | 12 |
| LUMO          | -9.12  | 54 | 18 | 18 | 10 |
| HOMO          | -10.36 | 38 | 46 | 09 | 07 |
| HOMO-1        | -10.86 | 42 | 07 | 22 | 29 |
| HOMO-2        | -10.98 | 53 | 19 | 06 | 22 |
| HOMO-3        | -11.27 | 33 | 46 | 05 | 16 |
| HOMO-4        | -11.65 | 43 | 45 | 12 | 0  |
| HOMO-5        | -11.93 | 34 | 39 | 18 | 09 |
| HOMO-6        | -12.09 | 07 | 40 | 02 | 51 |
| HOMO-7        | -12.16 | 08 | 05 | 86 | 01 |
| HOMO-8        | -12.25 | 08 | 49 | 05 | 38 |
| HOMO-9        | -12.33 | 21 | 03 | 21 | 55 |
| HOMO-10       | -12.38 | 30 | 05 | 12 | 53 |

---

**Table S10** Selected molecular orbitals along with their energies and compositions of  $3^{2+}$

( $S=1$ )

| $\alpha$ -spin |            |                 |    |      |    |
|----------------|------------|-----------------|----|------|----|
| MO             | Energy/ eV | Composition (%) |    |      |    |
|                |            | Ru              | L  | tppz | Cl |
| LUMO+5         | -6.31      | 06              | 02 | 91   | 01 |
| LUMO+4         | -6.33      | 02              | 01 | 97   | 0  |
| LUMO+3         | -6.41      | 05              | 01 | 93   | 01 |
| LUMO+2         | -7.13      | 03              | 06 | 91   | 0  |
| LUMO+1         | -8.03      | 12              | 03 | 84   | 01 |
| LUMO           | -8.31      | 04              | 02 | 94   | 0  |
| SOMO1          | -10.68     | 53              | 12 | 06   | 29 |
| SOMO2          | -10.77     | 24              | 62 | 03   | 11 |
| HOMO-2         | -10.90     | 21              | 68 | 03   | 08 |
| HOMO-3         | -10.96     | 34              | 18 | 11   | 37 |
| HOMO-4         | -11.25     | 47              | 12 | 07   | 34 |
| HOMO-5         | -11.27     | 46              | 08 | 07   | 39 |
| HOMO-6         | -11.82     | 13              | 17 | 68   | 02 |
| HOMO-7         | -11.91     | 35              | 34 | 12   | 19 |
| HOMO-8         | -11.91     | 03              | 80 | 04   | 13 |
| HOMO-9         | -11.93     | 07              | 66 | 15   | 12 |
| HOMO-10        | -12.07     | 40              | 30 | 06   | 24 |

---

| $\beta$ -spin |        |    |    |    |    |
|---------------|--------|----|----|----|----|
| LUMO+5        | -6.34  | 03 | 02 | 95 | 0  |
| LUMO+4        | -7.10  | 05 | 06 | 89 | 0  |
| LUMO+3        | -7.75  | 32 | 08 | 58 | 02 |
| LUMO+2        | -8.22  | 13 | 03 | 83 | 01 |
| LUMO+1        | -8.49  | 57 | 17 | 15 | 11 |
| LUMO          | -8.82  | 37 | 17 | 36 | 10 |
| HOMO          | -10.35 | 57 | 13 | 07 | 23 |
| HOMO-1        | -10.69 | 39 | 16 | 15 | 30 |
| HOMO-2        | -10.82 | 35 | 41 | 07 | 17 |
| HOMO-3        | -10.82 | 33 | 44 | 06 | 17 |
| HOMO-4        | -11.45 | 52 | 40 | 08 | 0  |
| HOMO-5        | -11.49 | 42 | 44 | 08 | 06 |
| HOMO-6        | -11.80 | 10 | 13 | 48 | 29 |
| HOMO-7        | -11.86 | 03 | 81 | 04 | 12 |
| HOMO-8        | -11.89 | 03 | 76 | 06 | 15 |
| HOMO-9        | -11.97 | 16 | 08 | 22 | 54 |
| HOMO-10       | -12.01 | 15 | 07 | 32 | 46 |

---

**Table S11** Selected molecular orbitals along with their energies and compositions of **1<sup>-</sup>**

( $S=1/2$ )

| $\alpha$ -spin |            |                 |    |      |    |
|----------------|------------|-----------------|----|------|----|
| MO             | Energy/ eV | Composition (%) |    |      |    |
|                |            | Ru              | L  | tppz | Cl |
| LUMO+5         | 1.79       | 07              | 10 | 83   | 0  |
| LUMO+4         | 1.69       | 03              | 86 | 11   | 0  |
| LUMO+3         | 1.69       | 03              | 90 | 07   | 0  |
| LUMO+2         | 1.65       | 04              | 0  | 96   | 0  |
| LUMO+1         | 0.93       | 08              | 01 | 91   | 0  |
| LUMO           | 0.58       | 22              | 01 | 75   | 02 |
| SOMO           | -0.77      | 08              | 01 | 91   | 0  |
| HOMO-1         | -1.68      | 68              | 05 | 14   | 13 |
| HOMO-2         | -1.96      | 64              | 13 | 13   | 10 |
| HOMO-3         | -2.09      | 58              | 12 | 16   | 14 |
| HOMO-4         | -2.30      | 46              | 04 | 25   | 25 |
| HOMO-5         | -2.30      | 75              | 09 | 08   | 08 |
| HOMO-6         | -2.34      | 75              | 11 | 09   | 05 |
| HOMO-7         | -3.49      | 04              | 07 | 59   | 30 |
| HOMO-8         | -3.64      | 17              | 13 | 06   | 64 |
| HOMO-9         | -3.65      | 11              | 05 | 05   | 79 |
| HOMO-10        | -3.66      | 13              | 47 | 08   | 32 |

---

| $\beta$ -spin |       |    |    |    |    |  |
|---------------|-------|----|----|----|----|--|
| LUMO+5        | 1.75  | 04 | 0  | 96 | 0  |  |
| LUMO+4        | 1.69  | 03 | 91 | 06 | 0  |  |
| LUMO+3        | 1.69  | 04 | 93 | 03 | 0  |  |
| LUMO+2        | 1.11  | 06 | 01 | 93 | 0  |  |
| LUMO+1        | 0.65  | 19 | 01 | 79 | 01 |  |
| LUMO          | 0.39  | 05 | 01 | 94 | 0  |  |
| HOMO          | -1.71 | 70 | 05 | 11 | 14 |  |
| HOMO-1        | -1.86 | 63 | 12 | 16 | 09 |  |
| HOMO-2        | -2.00 | 60 | 12 | 16 | 12 |  |
| HOMO-3        | -2.29 | 49 | 04 | 21 | 26 |  |
| HOMO-4        | -2.30 | 75 | 09 | 08 | 08 |  |
| HOMO-5        | -2.34 | 75 | 10 | 08 | 07 |  |
| HOMO-6        | -3.24 | 01 | 05 | 82 | 12 |  |
| HOMO-7        | -3.63 | 16 | 07 | 08 | 69 |  |
| HOMO-8        | -3.64 | 14 | 26 | 08 | 52 |  |
| HOMO-9        | -3.65 | 11 | 04 | 05 | 80 |  |
| HOMO-10       | -3.70 | 14 | 76 | 06 | 04 |  |

---

**Table S12** Selected molecular orbitals along with their energies and compositions of  $3^-$

( $S=1/2$ )

| $\alpha$ -spin |            |                 |    |      |    |
|----------------|------------|-----------------|----|------|----|
| MO             | Energy/ eV | Composition (%) |    |      |    |
|                |            | Ru              | L  | tppz | Cl |
| LUMO+5         | 1.67       | 08              | 50 | 42   | 0  |
| LUMO+4         | 1.61       | 02              | 75 | 23   | 0  |
| LUMO+3         | 1.57       | 03              | 43 | 53   | 01 |
| LUMO+2         | 1.55       | 02              | 11 | 86   | 01 |
| LUMO+1         | 0.82       | 09              | 07 | 84   | 0  |
| LUMO           | 0.52       | 22              | 05 | 72   | 01 |
| SOMO           | -1.00      | 09              | 03 | 88   | 0  |
| HOMO-1         | -1.76      | 67              | 05 | 14   | 14 |
| HOMO-2         | -2.04      | 62              | 12 | 10   | 16 |
| HOMO-3         | -2.16      | 56              | 13 | 15   | 16 |
| HOMO-4         | -2.32      | 64              | 09 | 13   | 14 |
| HOMO-5         | -2.39      | 60              | 09 | 17   | 14 |
| HOMO-6         | -2.42      | 67              | 10 | 13   | 10 |
| HOMO-7         | -3.54      | 03              | 09 | 65   | 23 |
| HOMO-8         | -3.68      | 11              | 11 | 08   | 70 |
| HOMO-9         | -3.72      | 15              | 49 | 02   | 34 |
| HOMO-10        | -3.73      | 15              | 52 | 01   | 32 |



---

| $\beta$ -spin |       |    |    |    |    |
|---------------|-------|----|----|----|----|
| LUMO+5        | 1.66  | 02 | 14 | 84 | 0  |
| LUMO+4        | 1.61  | 03 | 78 | 19 | 0  |
| LUMO+3        | 1.60  | 03 | 66 | 31 | 0  |
| LUMO+2        | 1.00  | 06 | 06 | 87 | 01 |
| LUMO+1        | 0.60  | 18 | 04 | 76 | 02 |
| LUMO          | 0.16  | 07 | 03 | 90 | 0  |
| HOMO          | -1.78 | 69 | 05 | 12 | 14 |
| HOMO-1        | -1.94 | 63 | 11 | 13 | 13 |
| HOMO-2        | -2.07 | 59 | 13 | 13 | 15 |
| HOMO-3        | -2.32 | 64 | 08 | 12 | 16 |
| HOMO-4        | -2.38 | 61 | 09 | 16 | 14 |
| HOMO-5        | -2.41 | 69 | 11 | 12 | 08 |
| HOMO-6        | -3.27 | 01 | 06 | 82 | 11 |
| HOMO-7        | -3.68 | 11 | 09 | 06 | 74 |
| HOMO-8        | -3.71 | 15 | 46 | 02 | 37 |
| HOMO-9        | -3.73 | 16 | 50 | 02 | 32 |
| HOMO-10       | -3.79 | 18 | 32 | 12 | 38 |

---

**Table S13** Electronic transitions at the TD-DFT/B3LYP/6-31G(d) level for **3<sup>n</sup>** ( $n = 0, +, 2+, -$ )

| $E_{\text{excitation}}$<br>/ eV | $\lambda_{\text{excitation}}$<br>/ nm<br>(expt.) | Oscillator<br>Strength<br>(expt.: $\epsilon/\text{dm}^3$<br>$\text{mol}^{-1}\text{cm}^{-1}$ ) | Transition                               | Character                                 |
|---------------------------------|--------------------------------------------------|-----------------------------------------------------------------------------------------------|------------------------------------------|-------------------------------------------|
| <b>3</b>                        |                                                  |                                                                                               |                                          |                                           |
| 0.9025                          | 1370<br>(1390)                                   | 0.0096<br>(1400)                                                                              | (89%)HOMO→LUMO                           | Ru(d $\pi$ )→tppz( $\pi^*$ )              |
| 1.1942                          | 1040<br>(1060)                                   | 0.0099<br>(1900)                                                                              | (82%)HOMO-1→LUMO                         | Ru(d $\pi$ )→tppz( $\pi^*$ )              |
| 1.7556                          | 706                                              | 0.0477                                                                                        | (28%)HOMO-4→LUMO+1<br>(26%)HOMO-3→LUMO+1 | Ru(d $\pi$ )/Cl(p $\pi$ )→tppz( $\pi^*$ ) |
| 1.7910                          | 690<br>(688)                                     | 0.0287<br>(19500)                                                                             | (33%)HOMO-5→LUMO+1<br>(30%)HOMO-3→LUMO+1 | Ru(d $\pi$ )/Cl(p $\pi$ )→tppz( $\pi^*$ ) |
| 1.8860                          | 660                                              | 0.1369                                                                                        | (35%)HOMO-5→LUMO+1<br>(32%)HOMO-4→LUMO+1 | Ru(d $\pi$ )/Cl(p $\pi$ )→tppz( $\pi^*$ ) |
| 2.4190                          | 510<br>(505)                                     | 0.0594<br>(7800)                                                                              | (87%)HOMO-2→LUMO+2                       | Ru(d $\pi$ )/Cl(p $\pi$ )→tppz( $\pi^*$ ) |
| 2.8784                          | 430                                              | 0.0734                                                                                        | (59%)HOMO-1→LUMO+3                       | Ru(d $\pi$ )/Cl(p $\pi$ )→tppz( $\pi^*$ ) |
| 2.9509                          | 420<br>(403)                                     | 0.0443                                                                                        | (79%)HOMO-1→LUMO+5                       | Ru(d $\pi$ )/Cl(p $\pi$ )→tppz( $\pi^*$ ) |

| $3^+$    |        |         |                                                          |                                                               |
|----------|--------|---------|----------------------------------------------------------|---------------------------------------------------------------|
| 0.6419   | 1930   | 0.0094  | (57%)HOMO-2( $\beta$ ) $\rightarrow$ LUMO( $\beta$ )     | Ru(d $\pi$ ) $\rightarrow$ Ru(d $\pi$ )                       |
|          | (1750) | (3000)  | (57%)HOMO-1( $\beta$ ) $\rightarrow$ LUMO( $\beta$ )     |                                                               |
| 0.9263   | 1340   | 0.0560  | (49%)HOMO( $\beta$ ) $\rightarrow$ LUMO( $\beta$ )       | Ru(d $\pi$ )/tppz( $\pi$ ) $\rightarrow$ Ru(d $\pi$ )         |
|          |        |         | (23%)HOMO-3( $\beta$ ) $\rightarrow$ LUMO( $\beta$ )     | Ru(d $\pi$ )/L $\rightarrow$ Ru(d $\pi$ )                     |
| 1.8817   | 660    | 0.0289  | (63%)HOMO-2( $\alpha$ ) $\rightarrow$ LUMO( $\alpha$ )   | Ru(d $\pi$ )/Cl(p $\pi$ ) $\rightarrow$                       |
|          | (639)  | (21000) |                                                          | tppz( $\pi^*$ )                                               |
| 1.9873   | 620    | 0.0349  | (51%)HOMO-7( $\beta$ ) $\rightarrow$ LUMO( $\beta$ )     | Cl(p $\pi$ ) $\rightarrow$ Ru(d $\pi$ )                       |
|          |        |         | (22%)HOMO-3( $\beta$ ) $\rightarrow$ LUMO+2( $\beta$ )   | Ru(d $\pi$ )/L $\rightarrow$ Ru(d $\pi$ )                     |
| 2.0179   | 610    | 0.0609  | (49%)HOMO-2( $\alpha$ ) $\rightarrow$ LUMO+1( $\alpha$ ) | Ru(d $\pi$ )/Cl(p $\pi$ ) $\rightarrow$                       |
|          |        |         | (21%)HOMO-5( $\beta$ ) $\rightarrow$ LUMO( $\beta$ )     | tppz( $\pi^*$ )                                               |
|          |        |         |                                                          | Ru(d $\pi$ )/L $\rightarrow$ Ru(d $\pi$ )                     |
| 2.4862   | 500    | 0.0267  | (37%)HOMO-6( $\beta$ ) $\rightarrow$ LUMO+1( $\beta$ )   | Ru(d $\pi$ )/L $\rightarrow$ tppz( $\pi^*$ )                  |
|          | (473)  |         | (25%)HOMO-5( $\beta$ ) $\rightarrow$ LUMO+1( $\beta$ )   |                                                               |
| 2.6527   | 470    | 0.0353  | (65%)SOMO( $\alpha$ ) $\rightarrow$ LUMO+2( $\alpha$ )   | Ru(d $\pi$ )/L $\rightarrow$ tppz( $\pi^*$ )                  |
| $3^{2+}$ |        |         |                                                          |                                                               |
| 1.5516   | 800    | 0.0299  | (62%)HOMO-2( $\beta$ ) $\rightarrow$ LUMO( $\beta$ )     | Ru(d $\pi$ )/L $\rightarrow$ tppz( $\pi^*$ )/<br>Ru(d $\pi$ ) |
| 1.7997   | 690    | 0.0764  | (39%)HOMO-5( $\beta$ ) $\rightarrow$ LUMO( $\beta$ )     | Ru(d $\pi$ )/L $\rightarrow$ tppz( $\pi^*$ )/                 |
|          | (655)  | (9100)  | (27%)HOMO-3( $\beta$ ) $\rightarrow$ LUMO+1( $\beta$ )   | Ru(d $\pi$ )                                                  |
|          |        |         |                                                          | Ru(d $\pi$ )/L $\rightarrow$ Ru(d $\pi$ )                     |
| 1.8530   | 670    | 0.0246  | (66%)HOMO-3( $\beta$ ) $\rightarrow$ LUMO+1( $\beta$ )   | Ru(d $\pi$ )/L $\rightarrow$ Ru(d $\pi$ )                     |

|        |       |        |                                                        |                                              |
|--------|-------|--------|--------------------------------------------------------|----------------------------------------------|
| 2.1005 | 590   | 0.0203 | (56%)HOMO-7( $\beta$ ) $\rightarrow$ LUMO( $\beta$ )   | L $\rightarrow$ tppz( $\pi^*$ )/Ru(d $\pi$ ) |
|        | (605) |        |                                                        |                                              |
| 2.1235 | 580   | 0.0231 | (42%)HOMO-8( $\beta$ ) $\rightarrow$ LUMO( $\beta$ )   | L $\rightarrow$ tppz( $\pi^*$ )/Ru(d $\pi$ ) |
|        |       |        | (27%)HOMO-7( $\beta$ ) $\rightarrow$ LUMO( $\beta$ )   |                                              |
| 2.3597 | 520   | 0.0109 | (71%)HOMO-7( $\beta$ ) $\rightarrow$ LUMO+1( $\beta$ ) | L $\rightarrow$ Ru(d $\pi$ )                 |
|        | (518) | (7200) |                                                        |                                              |
| 2.5433 | 490   | 0.0216 | (61%)HOMO-8( $\beta$ ) $\rightarrow$ LUMO+1( $\beta$ ) | L $\rightarrow$ tppz( $\pi^*$ )/Ru(d $\pi$ ) |

---

**3<sup>-</sup>**

|        |        |         |                                                        |                                             |
|--------|--------|---------|--------------------------------------------------------|---------------------------------------------|
| 1.0313 | 1200   | 0.0031  | (54%)SOMO( $\alpha$ ) $\rightarrow$ LUMO( $\alpha$ )   | tppz( $\pi$ ) $\rightarrow$ tppz( $\pi^*$ ) |
|        | (1177) | (3400)  | (41%)HOMO( $\beta$ ) $\rightarrow$ LUMO+1( $\beta$ )   | Ru(d $\pi$ ) $\rightarrow$ tppz( $\pi^*$ )  |
| 1.0437 | 1190   | 0.0102  | (51%)SOMO( $\alpha$ ) $\rightarrow$ LUMO+1( $\alpha$ ) | tppz( $\pi$ ) $\rightarrow$ tppz( $\pi^*$ ) |
|        |        |         | (40%)HOMO( $\beta$ ) $\rightarrow$ LUMO( $\beta$ )     | Ru(d $\pi$ ) $\rightarrow$ tppz( $\pi^*$ )  |
| 1.1939 | 1040   | 0.0248  | (53%)HOMO( $\beta$ ) $\rightarrow$ LUMO( $\beta$ )     | Ru(d $\pi$ ) $\rightarrow$ tppz( $\pi^*$ )  |
|        | (1048) | (5200)  | (27%)SOMO( $\alpha$ ) $\rightarrow$ LUMO+1( $\alpha$ ) | tppz( $\pi$ ) $\rightarrow$ tppz( $\pi^*$ ) |
| 1.3084 | 950    | 0.0138  | (92%)HOMO-1( $\beta$ ) $\rightarrow$ LUMO( $\beta$ )   | Ru(d $\pi$ ) $\rightarrow$ tppz( $\pi^*$ )  |
| 1.8096 | 680    | 0.0321  | (43%)HOMO( $\beta$ ) $\rightarrow$ LUMO+1( $\beta$ )   | Ru(d $\pi$ ) $\rightarrow$ tppz( $\pi^*$ )  |
|        |        |         | (27%)HOMO-4( $\beta$ ) $\rightarrow$ LUMO+1( $\beta$ ) |                                             |
| 1.8465 | 670    | 0.0461  | (47%)SOMO( $\alpha$ ) $\rightarrow$ LUMO+2( $\alpha$ ) | tppz( $\pi$ ) $\rightarrow$ tppz( $\pi^*$ ) |
|        | (665)  | (11500) | (23%)HOMO-3( $\beta$ ) $\rightarrow$ LUMO+1( $\beta$ ) | Ru(d $\pi$ ) $\rightarrow$ tppz( $\pi^*$ )  |
| 1.8981 | 650    | 0.0375  | (43%)HOMO-3( $\beta$ ) $\rightarrow$ LUMO+1( $\beta$ ) | Ru(d $\pi$ ) $\rightarrow$ tppz( $\pi^*$ )  |
|        |        |         | (24%)HOMO-4( $\beta$ ) $\rightarrow$ LUMO+1( $\beta$ ) |                                             |

|        |       |         |                                                          |                                            |
|--------|-------|---------|----------------------------------------------------------|--------------------------------------------|
| 2.0470 | 600   | 0.0245  | (43%)HOMO-4( $\beta$ ) $\rightarrow$ LUMO+2( $\beta$ )   | Ru(d $\pi$ ) $\rightarrow$ tppz( $\pi^*$ ) |
|        |       |         | (24%)HOMO-5( $\beta$ ) $\rightarrow$ LUMO+2( $\beta$ )   |                                            |
| 2.1314 | 580   | 0.0318  | (71%)HOMO-3( $\alpha$ ) $\rightarrow$ LUMO+1( $\alpha$ ) | Ru(d $\pi$ ) $\rightarrow$ tppz( $\pi^*$ ) |
|        | (594) | (12300) |                                                          |                                            |

---

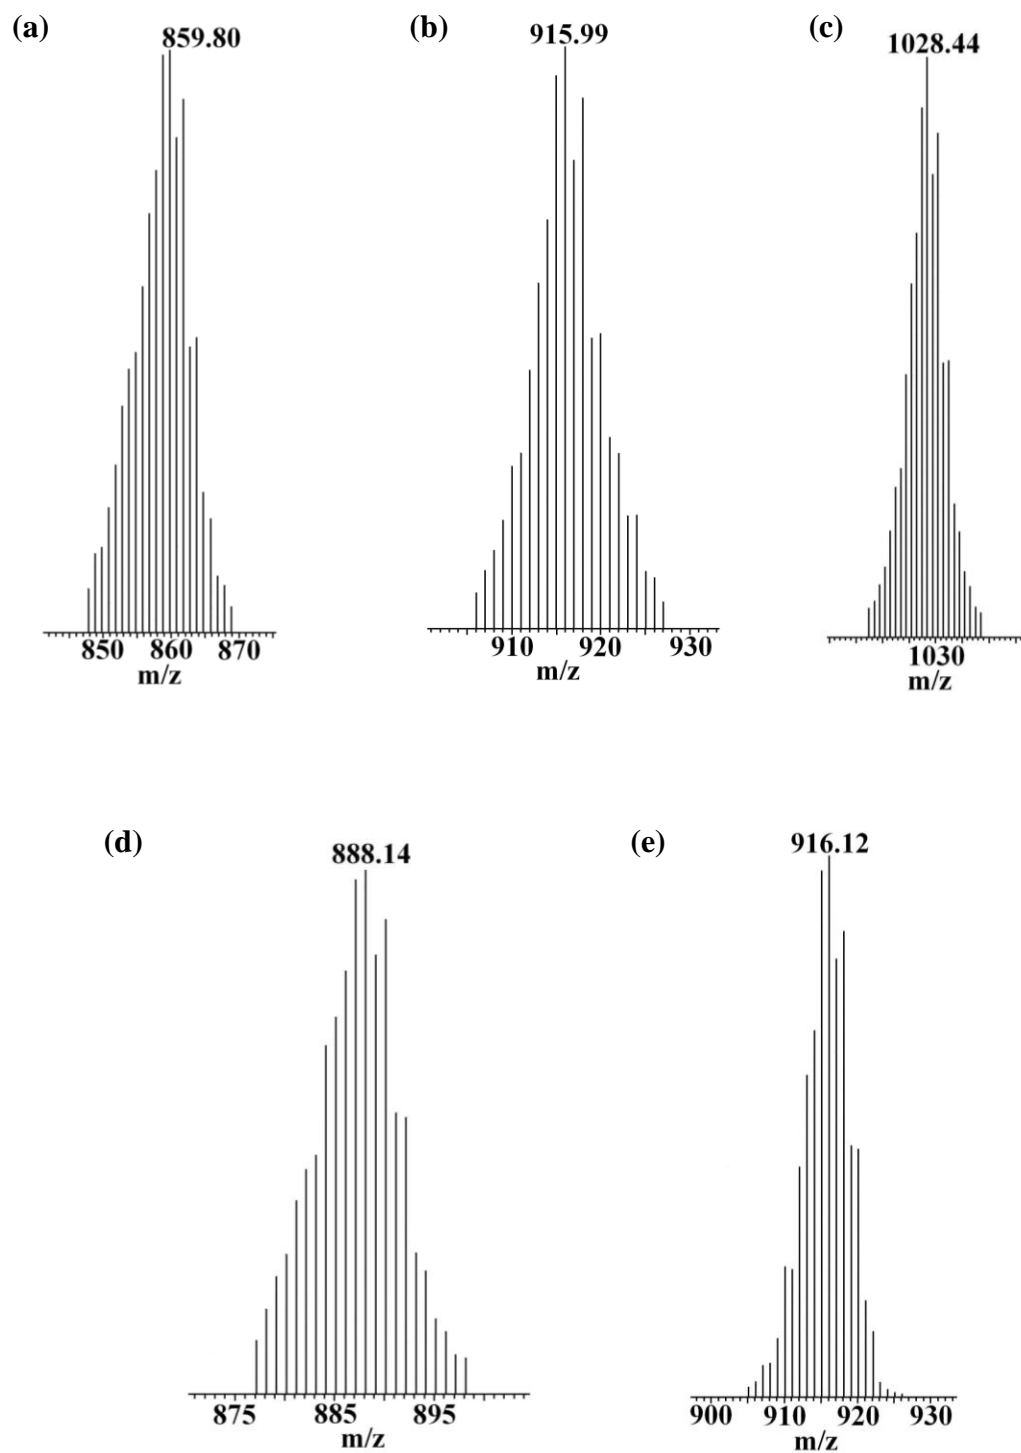

**Fig. S1** Mass spectra of (a) **1**, (b) **2**, (c) **3**, (d) **4** and (e) **5** in  $\text{CH}_3\text{CN}$ .

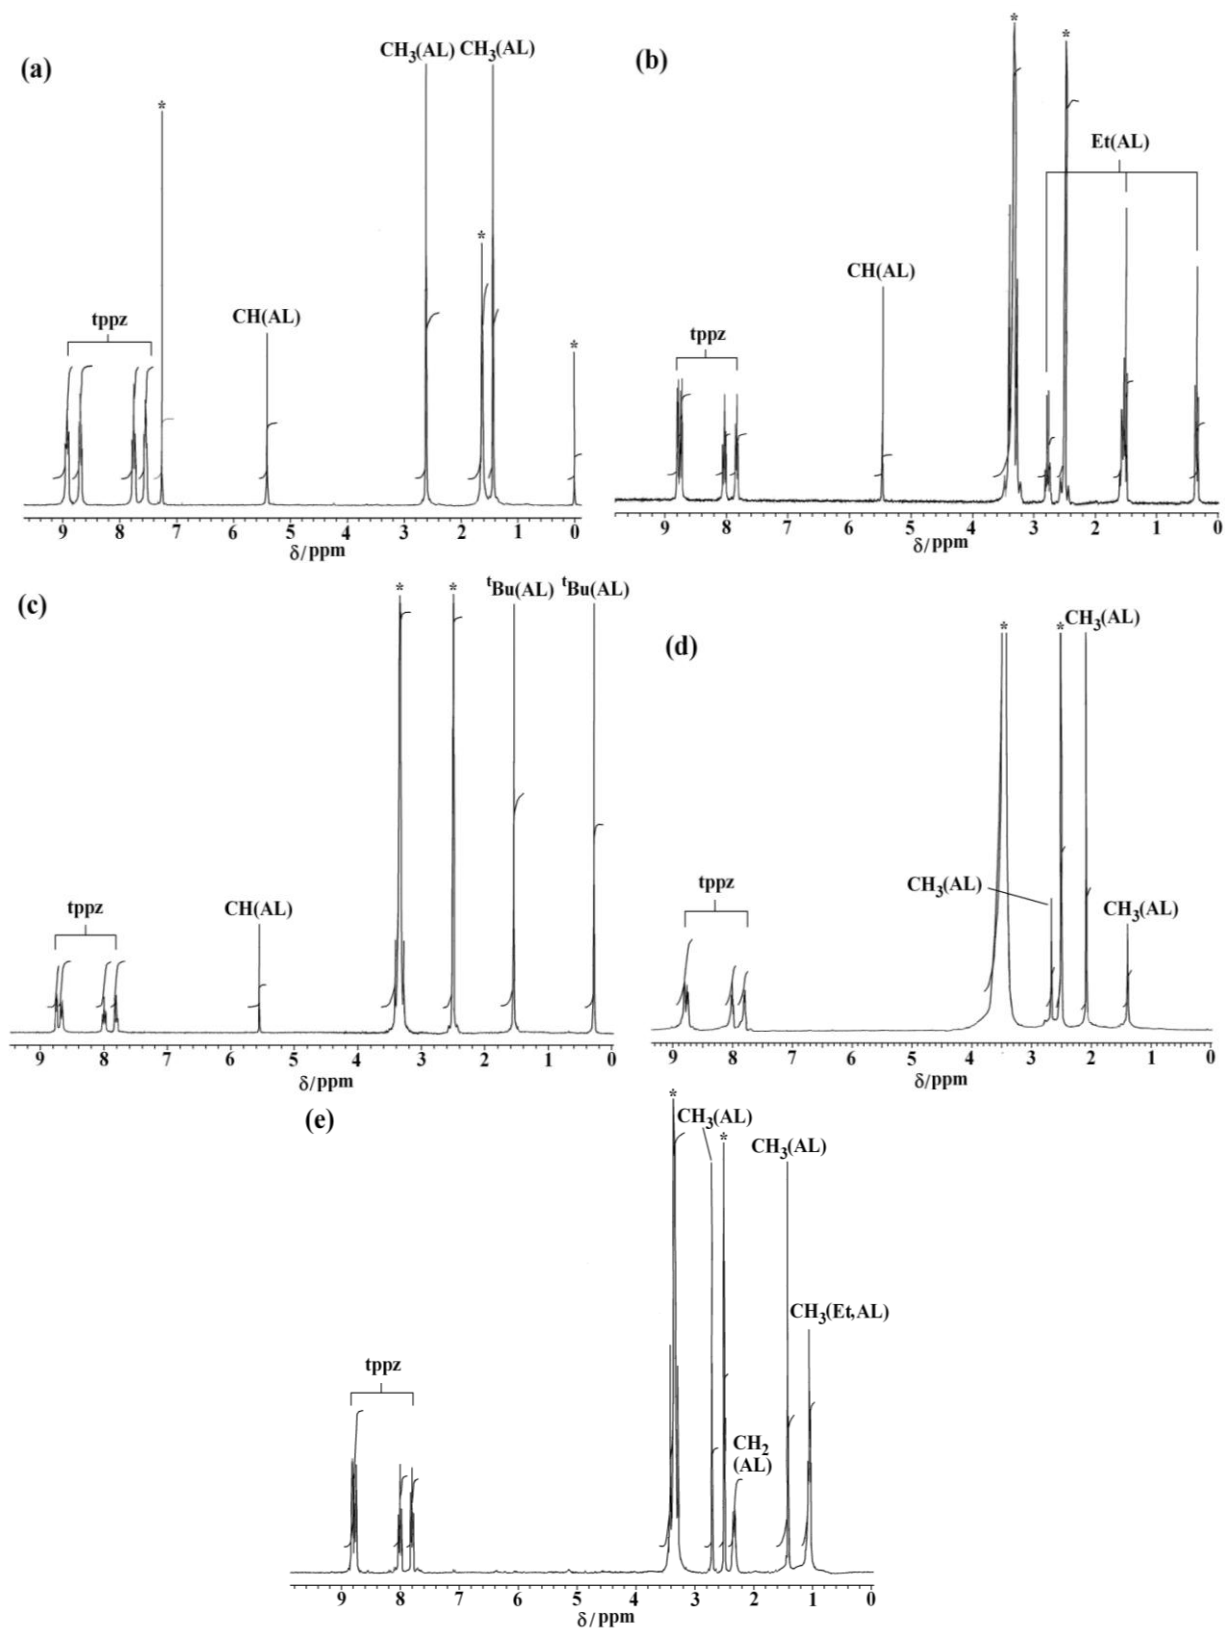

**Fig. S2**  $^1\text{H}$  NMR spectra of (a) **1** in  $\text{CDCl}_3$ , (b) **2**, (c) **3**, (d) **4** and (e) **5** in  $(\text{CD}_3)_2\text{SO}$  (\* indicates solvent peak).

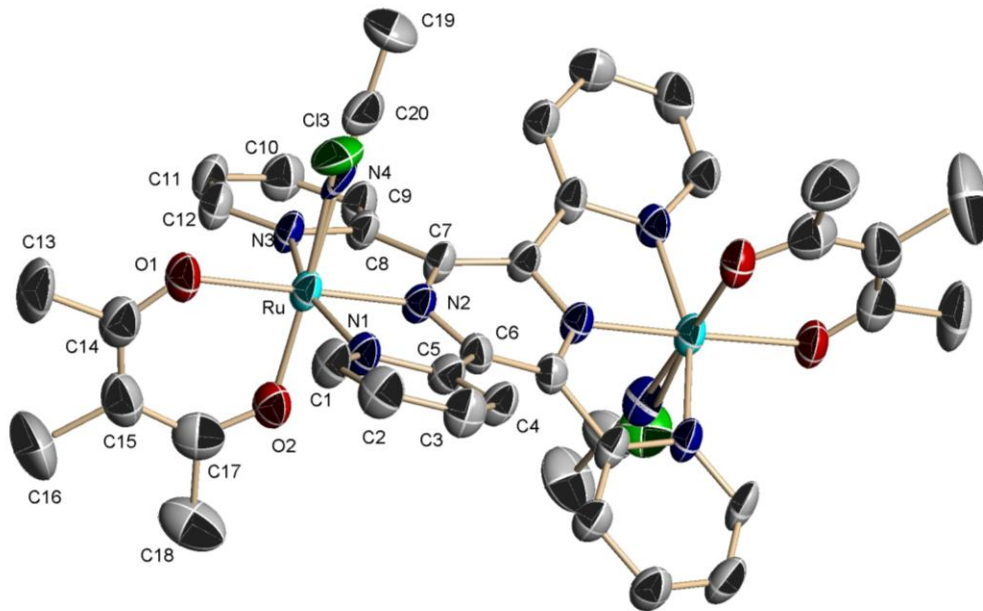

**Fig. S3** ORTEP diagram of the dicationic form of **4'**. Counter anions, solvent of crystallisation and hydrogen atoms are omitted for clarity.



(a)

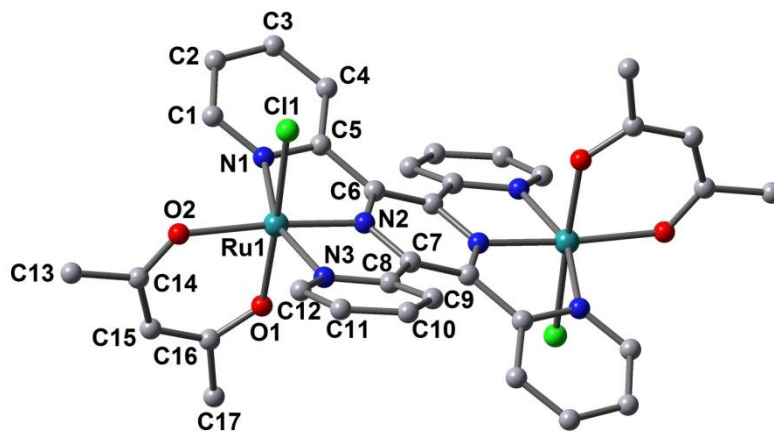

(b)

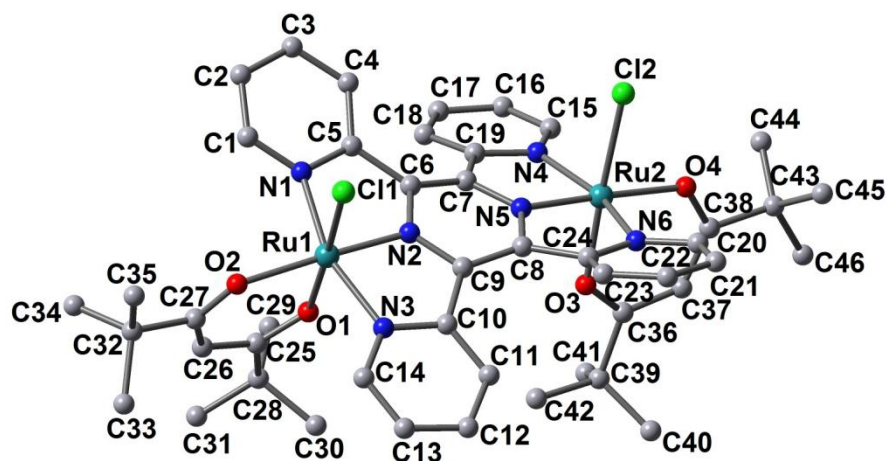

**Fig. S4** DFT optimised structures of (a) **1** and (b) **3**.

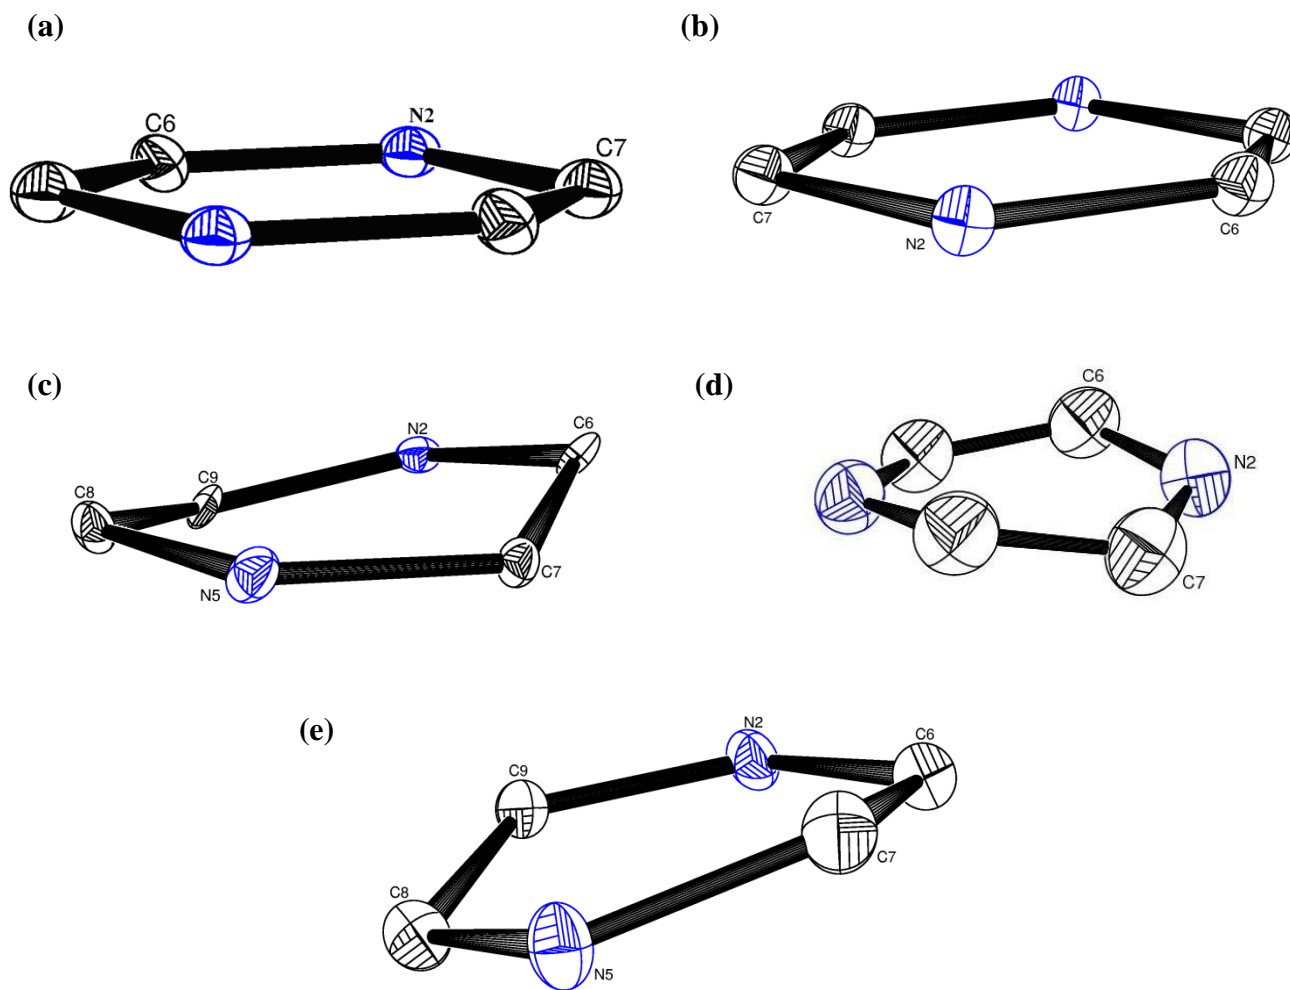

**Fig. S5** Non-planarity of the pyrazine ring of tppz in the crystal structures of (a) **1**, (b) **2**, (c) **3**, (d) **4'** and (e) **5**.

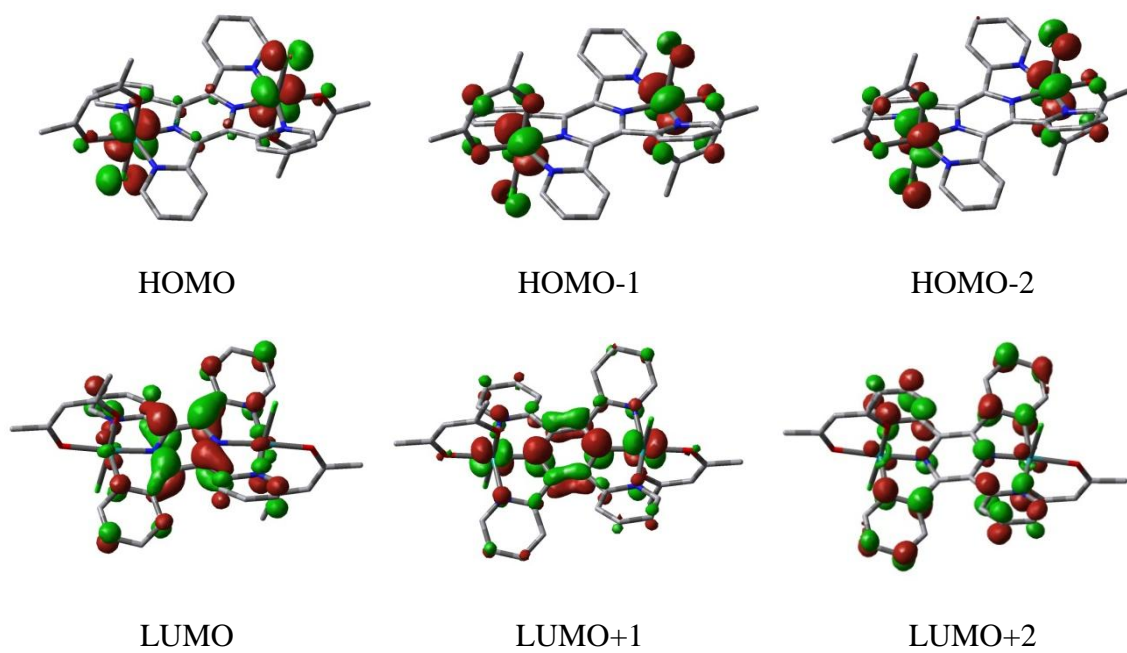

**Fig. S6** Selected molecular orbitals of **1**.

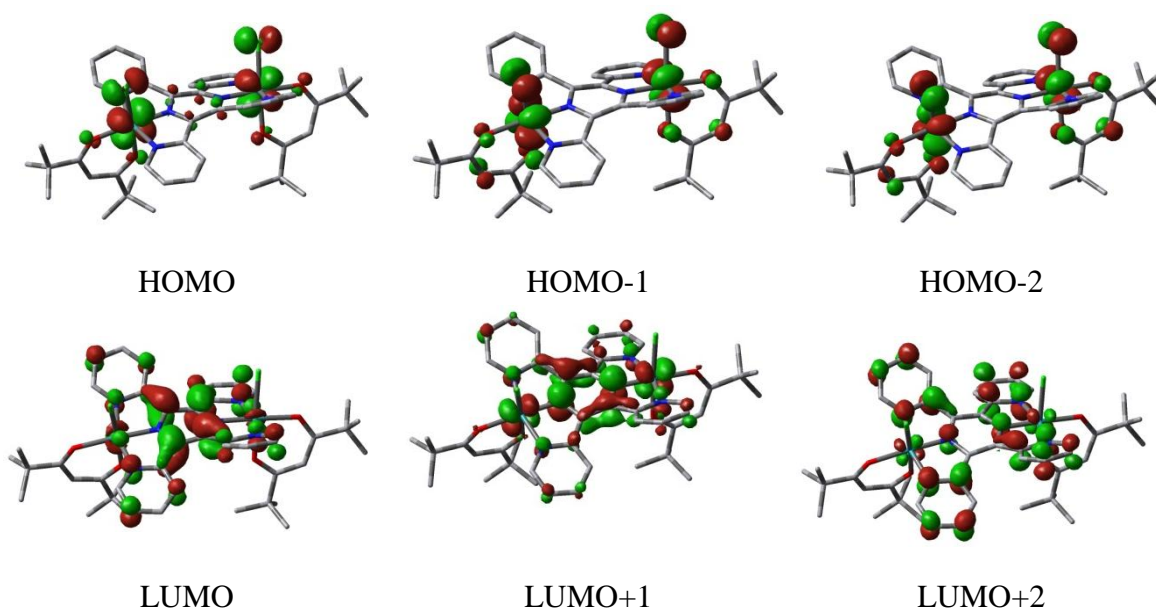

**Fig. S7** Selected molecular orbitals of **3**.

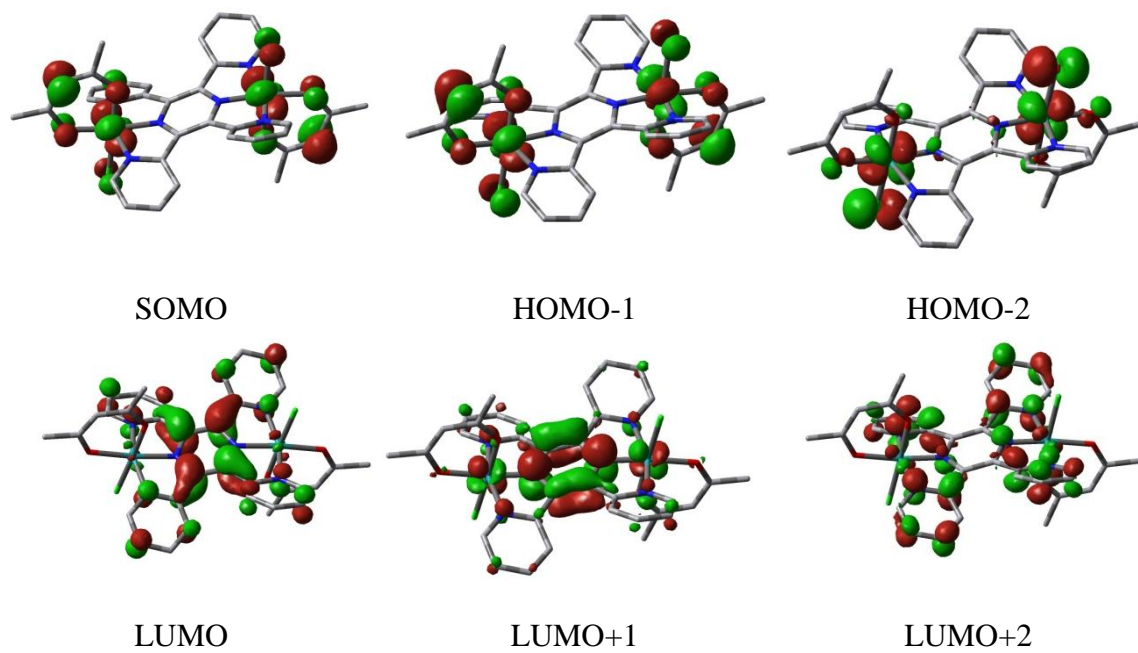

**Fig. S8** Selected molecular orbitals of  $1^+$  ( $\alpha$ -spin).

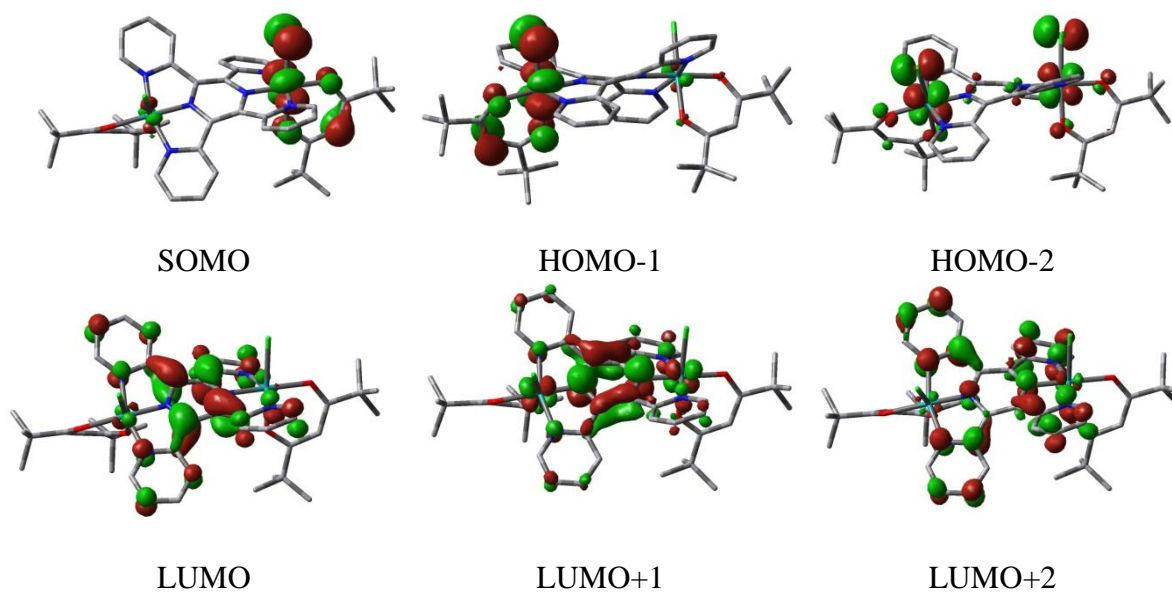

**Fig. S9** Selected molecular orbitals of  $3^+$  ( $\alpha$ -spin).

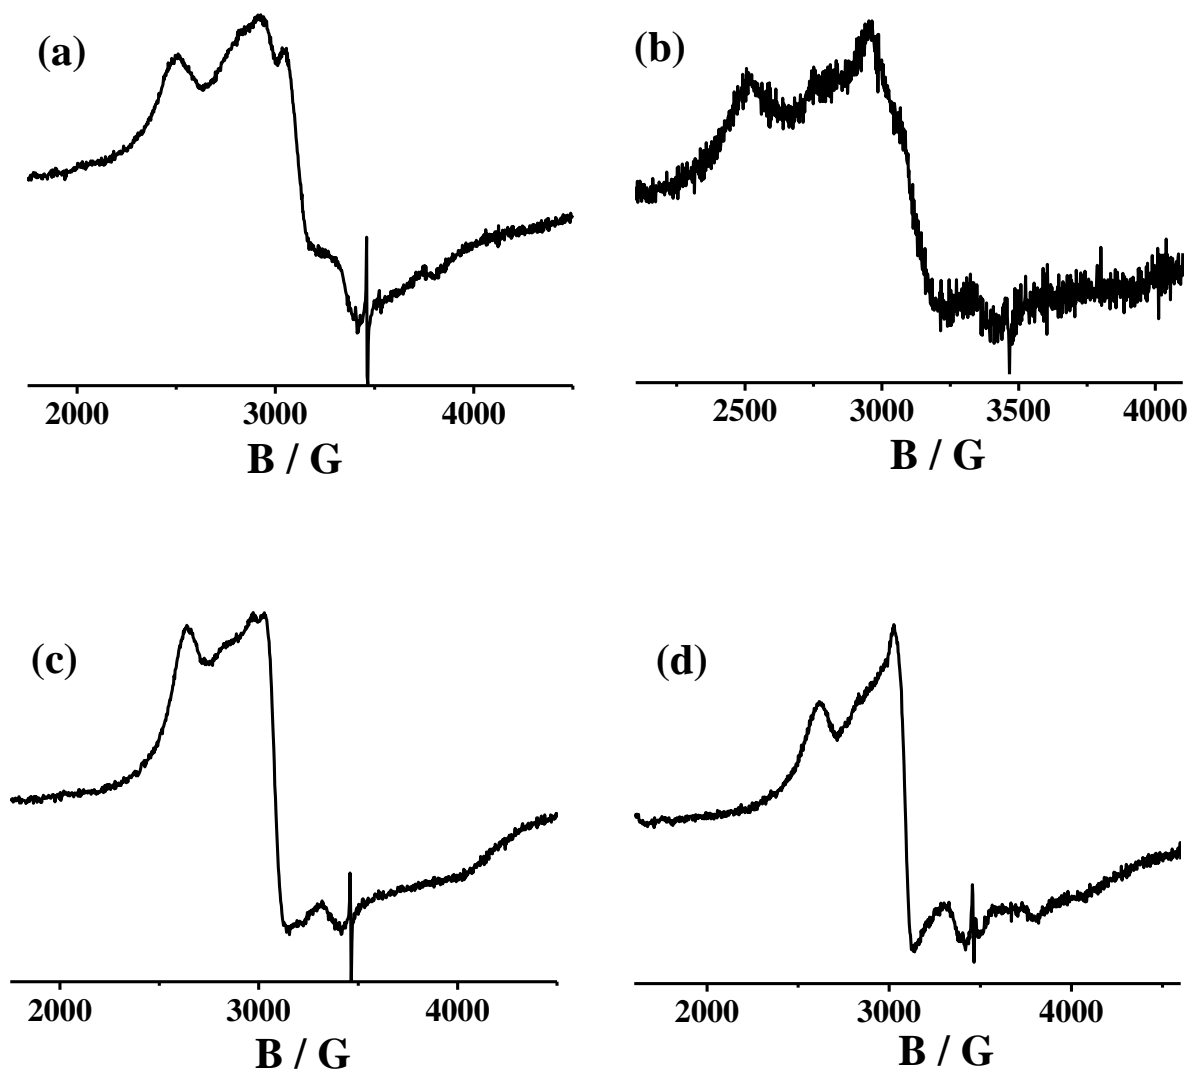

**Fig. S10** EPR spectra of (a)  $1^+$ , (b)  $2^+$ , (c)  $4^+$  and (d)  $5^+$  in  $\text{CH}_3\text{CN}$ ,  $0.1 \text{ mol dm}^{-3} \text{ Bu}_4\text{NPF}_6$  at 110 K.

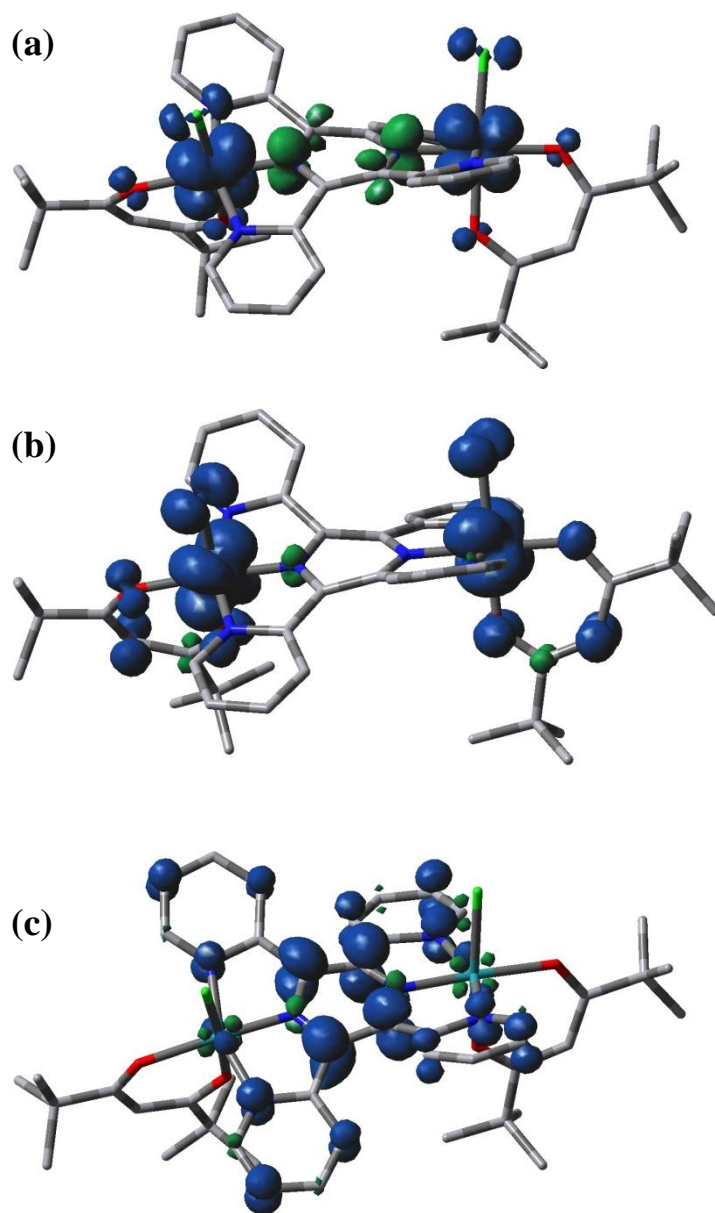

**Fig. S11** Spin density plots of (a)  $3^+$ , (b)  $3^{2+}$  and (b)  $3^-$ .



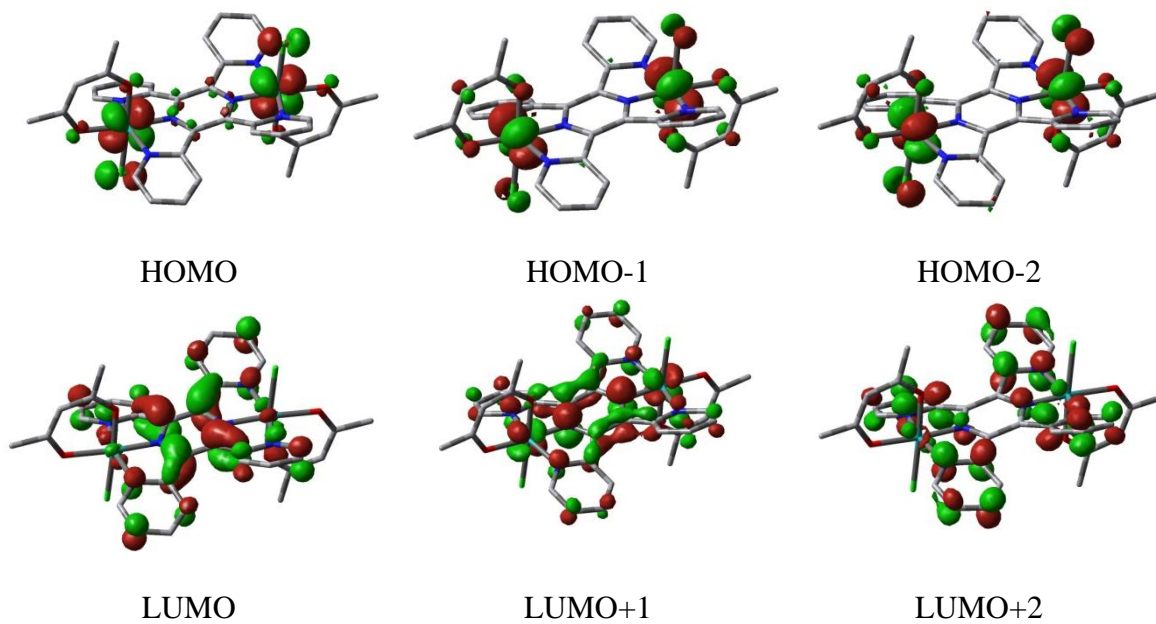

**Fig. S12** Selected molecular orbitals of  $1^-$  ( $\beta$ -spin).

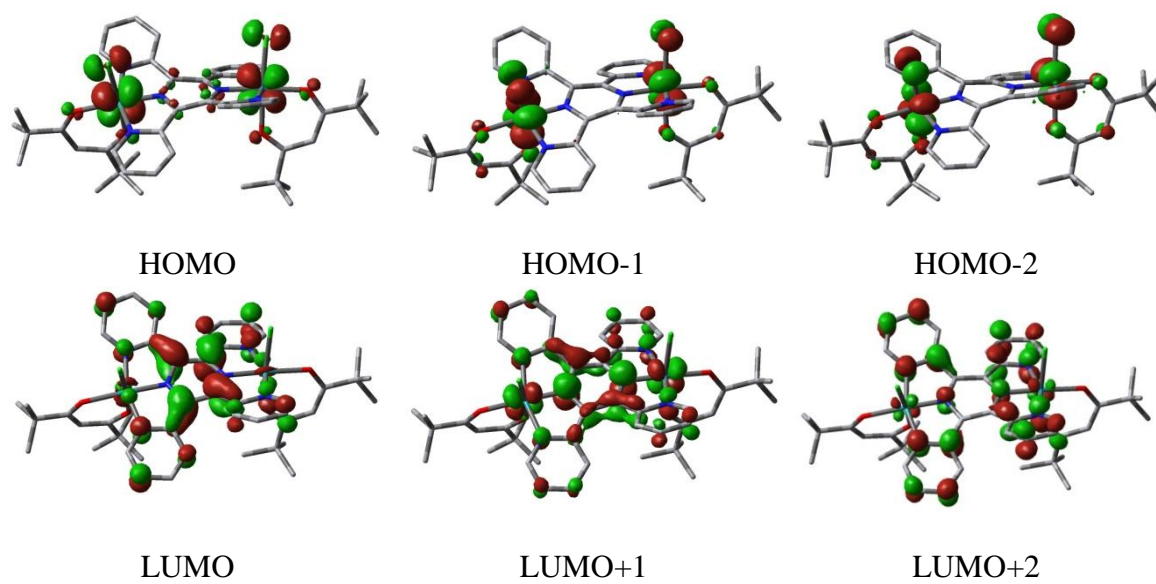

**Fig. S13** Selected molecular orbitals of  $3^-$  ( $\beta$ -spin).

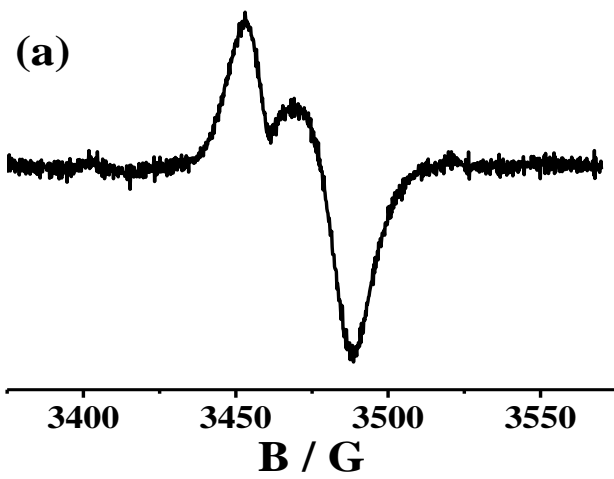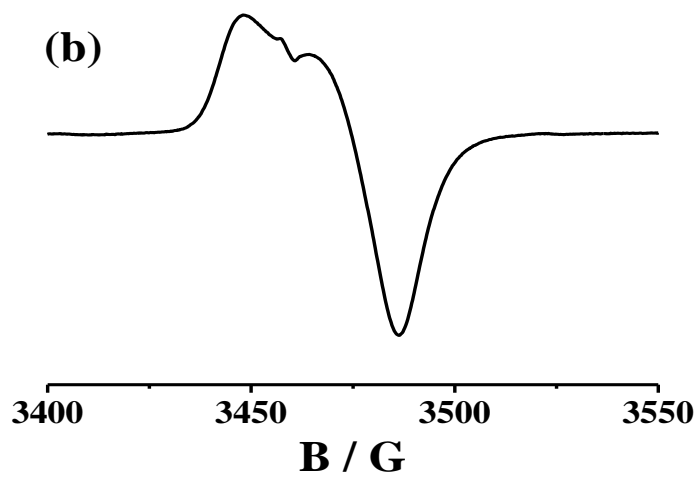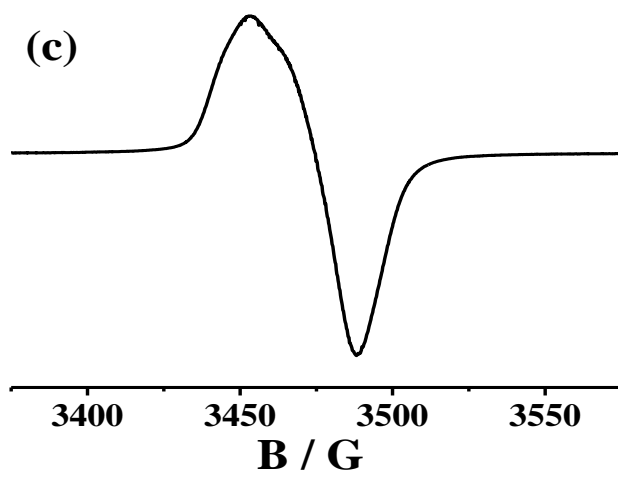

**Fig. S14** EPR spectra of (a)  $1^-$ , (b)  $2^-$  and (c)  $5^-$  in  $\text{CH}_3\text{CN}$ ,  $0.1 \text{ mol dm}^{-3} \text{Bu}_4\text{NPF}_6$  at 110

K.

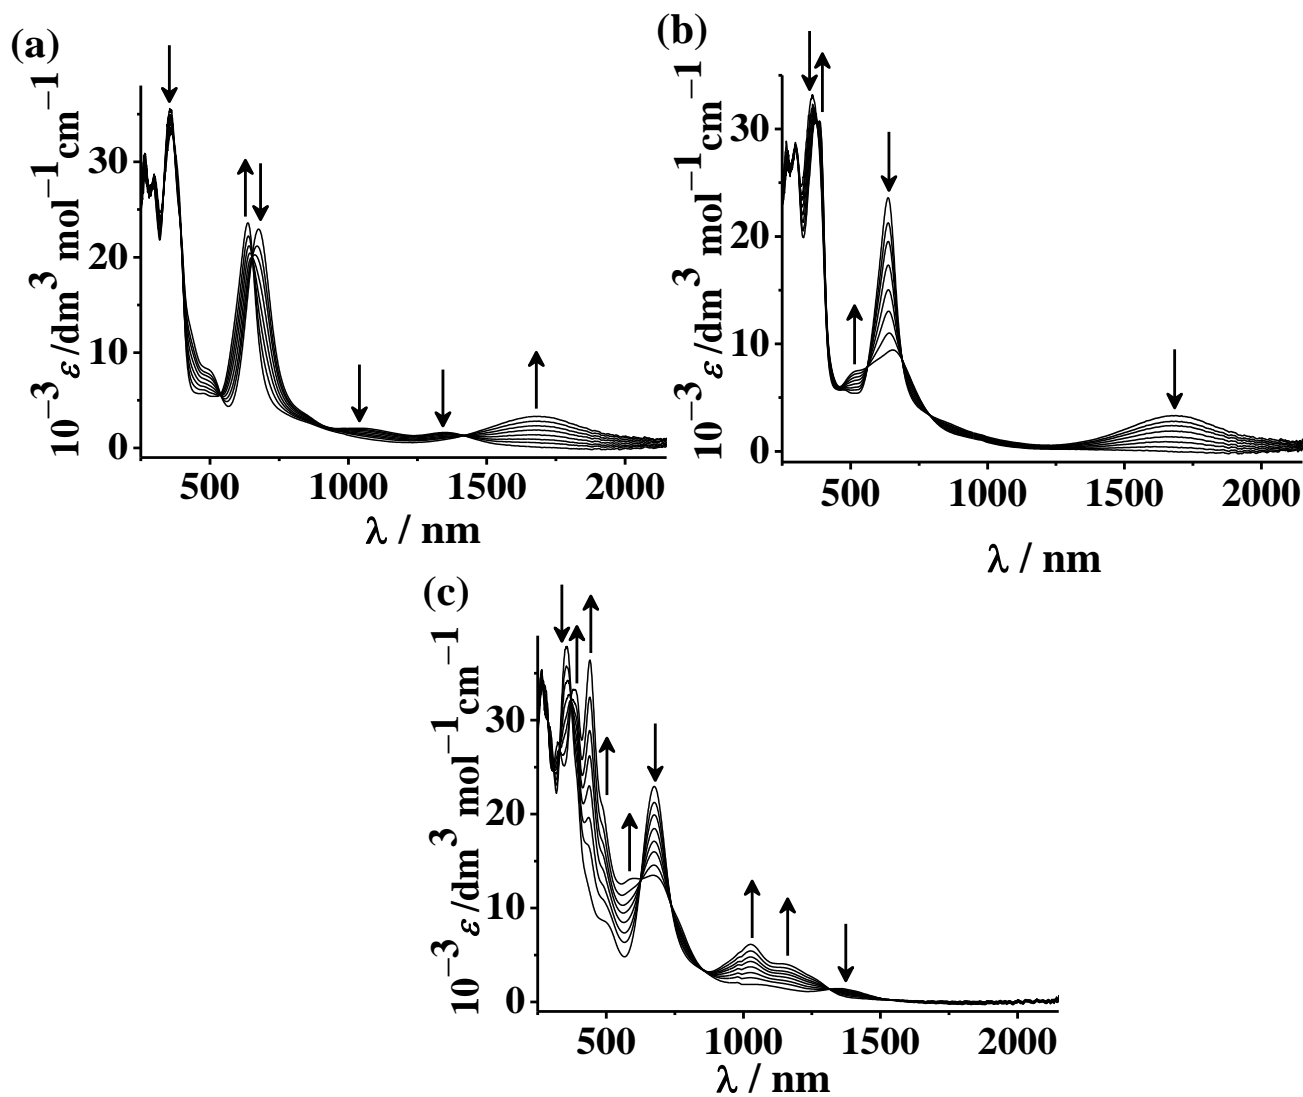

**Fig. S15** UV-VIS-NIR spectroelectrochemistry for the conversions of (a)  $2 \rightarrow 2^+$ , (b)  $2^+ \rightarrow 2^{2+}$  and (c)  $2 \rightarrow 2^-$  in  $\text{CH}_3\text{CN}$ ,  $0.1 \text{ mol dm}^{-3} \text{Bu}_4\text{NPF}_6$ .

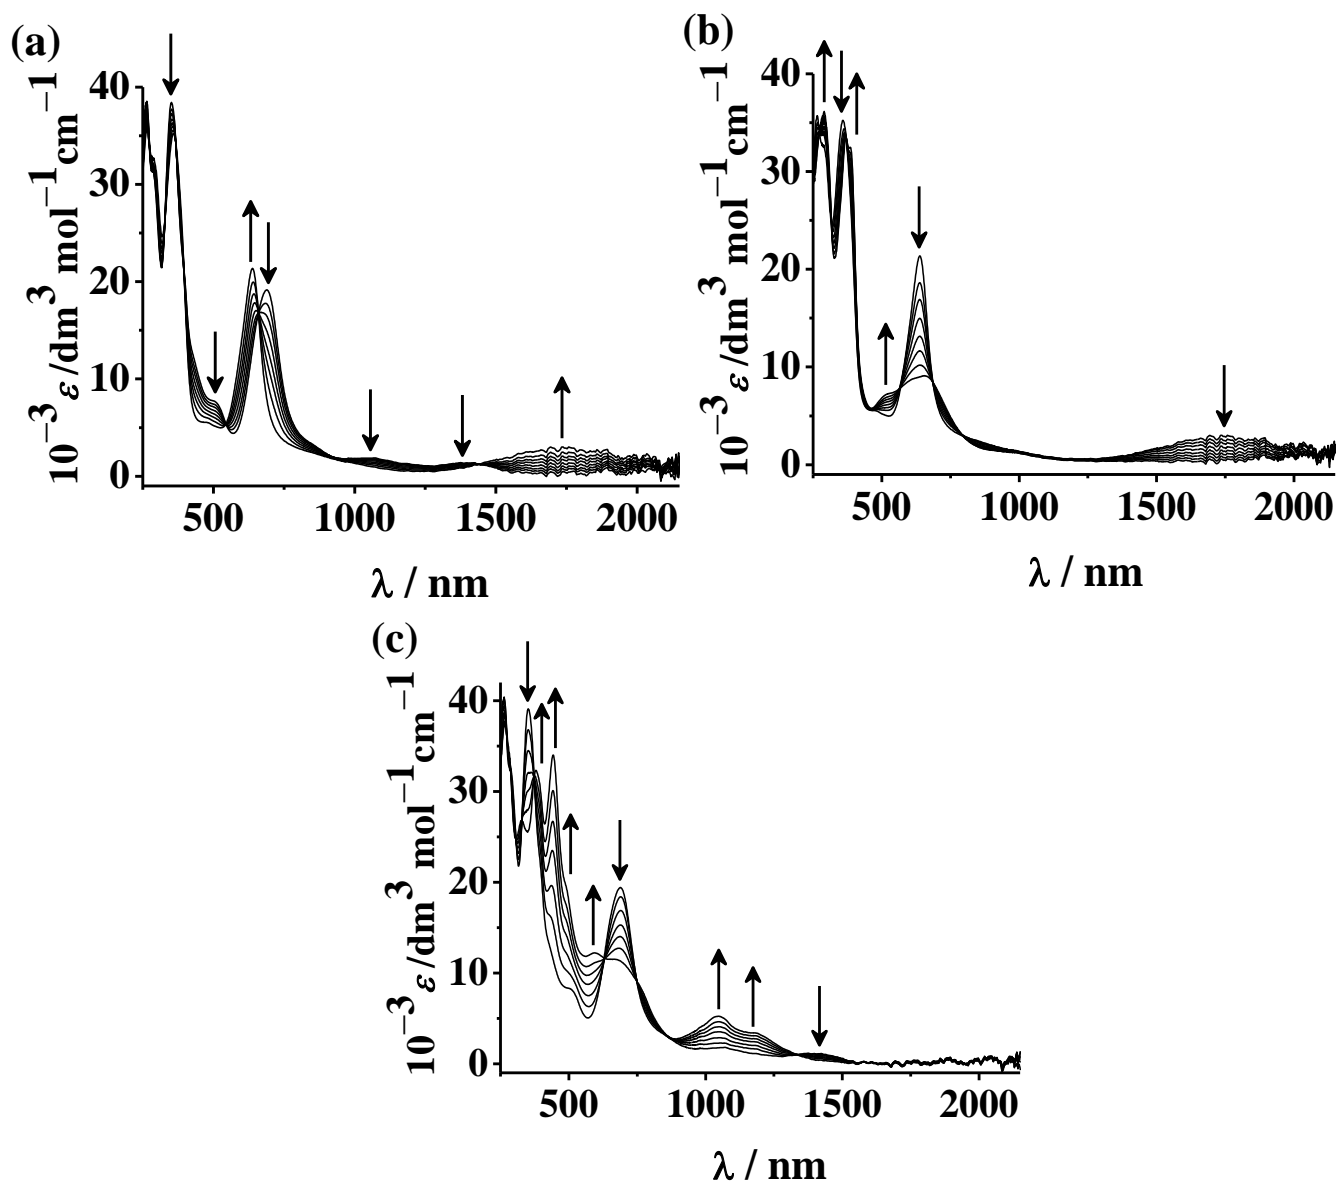

**Fig. S16** UV-VIS-NIR spectroelectrochemistry for the conversions of (a) **3**  $\rightarrow$   $3^+$ , (b)  $3^+$   $\rightarrow$   $3^{2+}$  and (c) **3**  $\rightarrow$   $3^-$  in  $\text{CH}_3\text{CN}$ ,  $0.1 \text{ mol dm}^{-3} \text{ Bu}_4\text{NPF}_6$ .

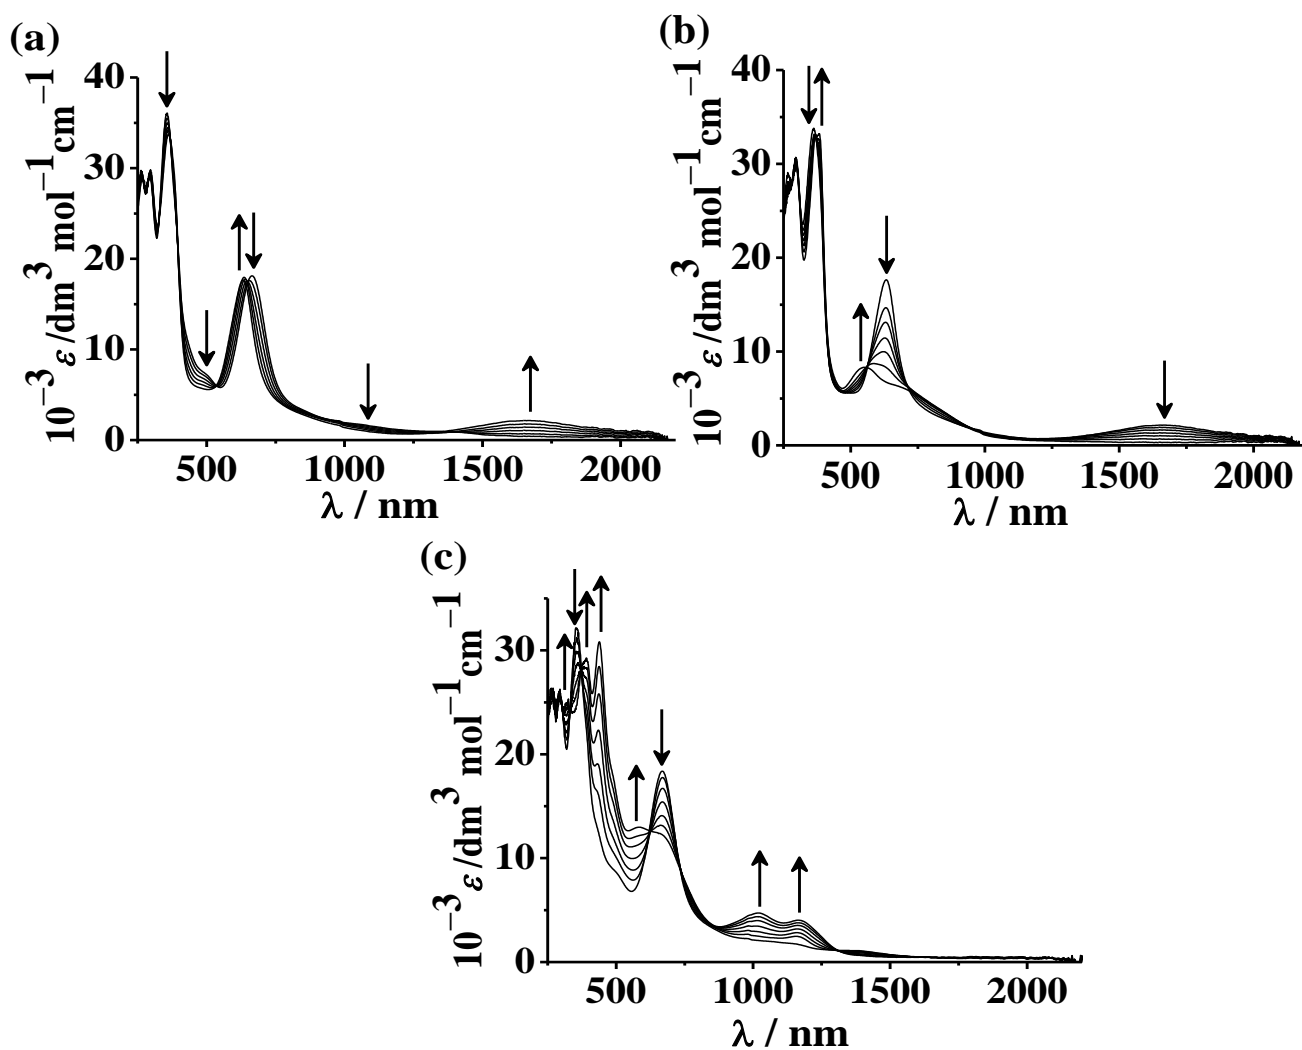

**Fig. S17** UV-VIS-NIR spectroelectrochemistry for the conversions of (a) **4**  $\rightarrow$   $4^+$ , (b)  $4^+$   $\rightarrow$   $4^{2+}$  and (c) **4**  $\rightarrow$   $4^-$  in  $\text{CH}_3\text{CN}$ ,  $0.1 \text{ mol dm}^{-3} \text{Bu}_4\text{NPF}_6$ .

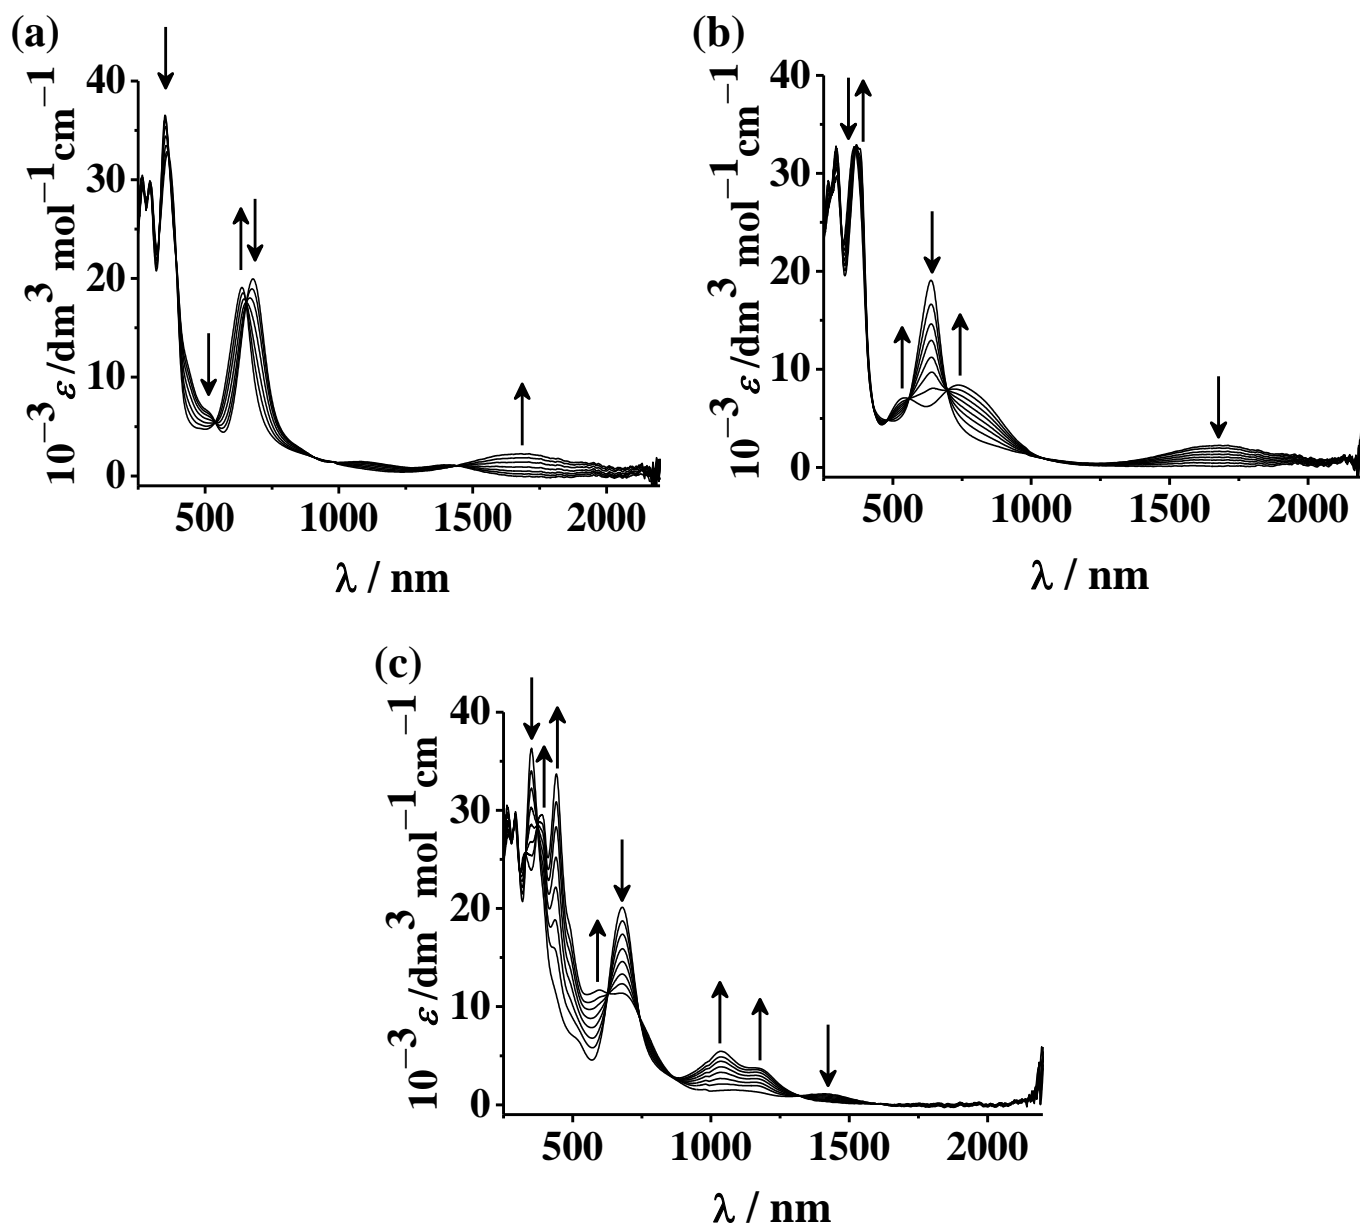

**Fig. S18** UV-VIS-NIR spectroelectrochemistry for the conversions of (a)  $5 \rightarrow 5^+$ , (b)  $5^+ \rightarrow 5^{2+}$  and (c)  $5 \rightarrow 5^-$  and in  $\text{CH}_3\text{CN}$ ,  $0.1 \text{ mol dm}^{-3} \text{Bu}_4\text{NPF}_6$ .
